# Supplementary material
Source: bioRxiv or medRxiv preprint supplement (https://www.biorxiv.org/highwire/filestream/34599/field_highwire_adjunct_files/0/073650-1.pdf)
Supplement: Supplementary file [file 073650-1.pdf]

- 1 Figure S1. Map of distribution of the samplings done in Rollainville orchard for five
- 2 seasons. Dots represent ascocarp samples, crosses represent ectomycorrhizal samplings
- 3 and squares represent soil samplings.

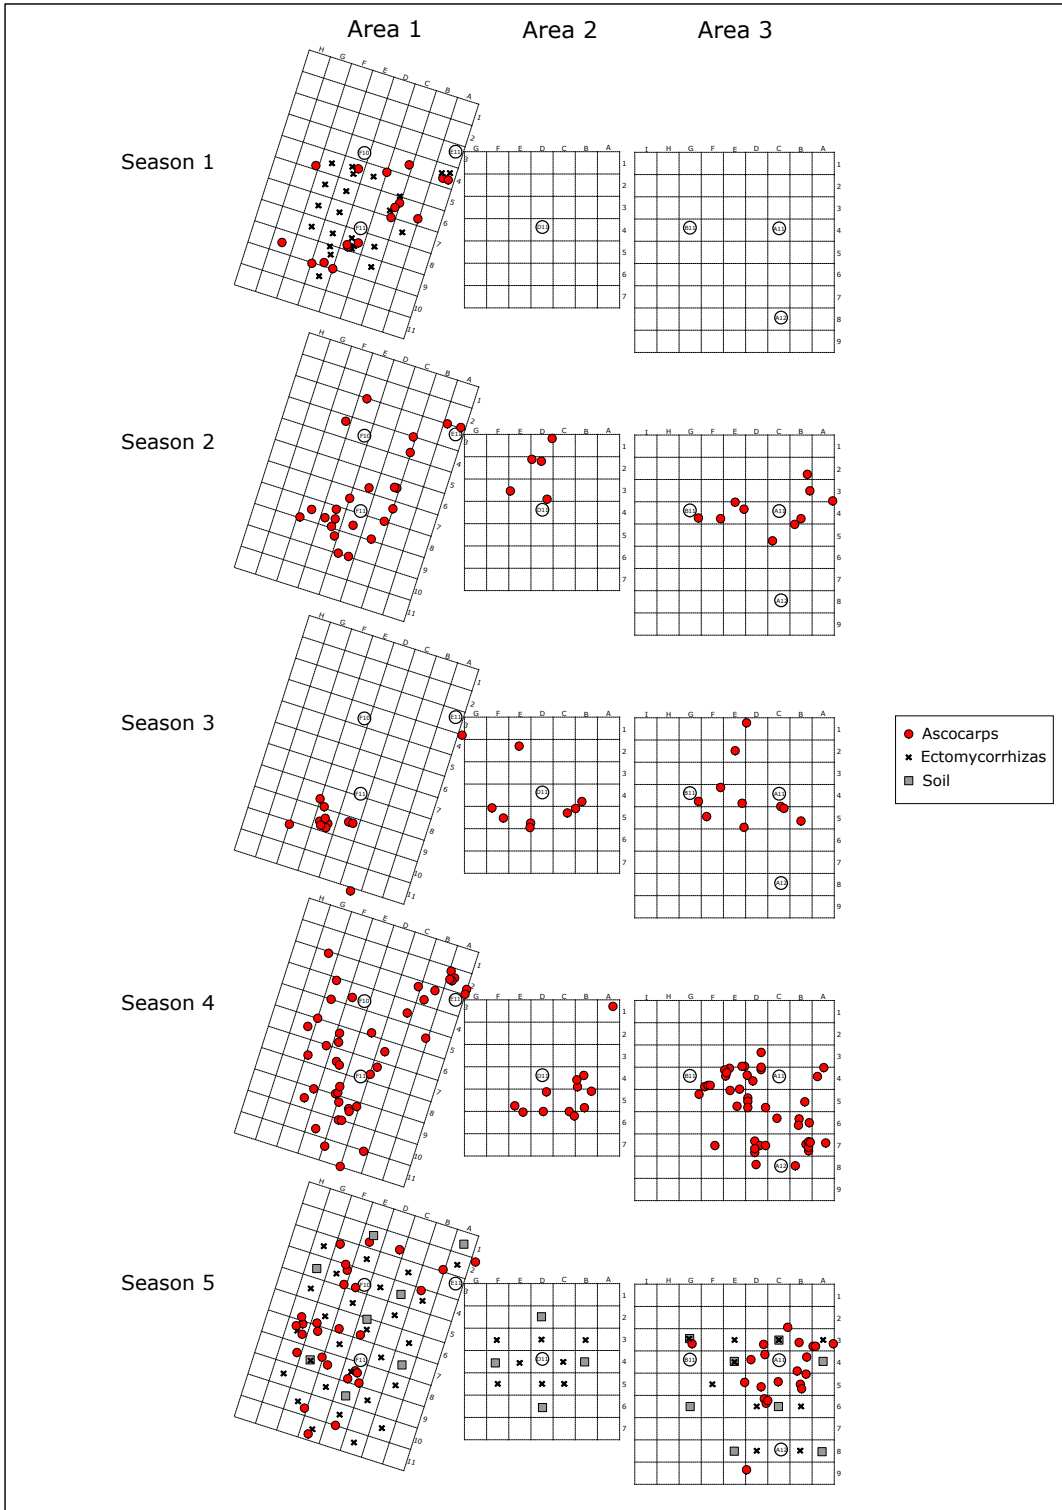

4

5 Figure S2. Map of distribution of the perennial female strain R002 in the Rollainville  
 6 orchard trough five seasons. Circles represent ascocarps and crosses represent  
 7 ectomycorrhizas. Each season is represented by a different colour.

8

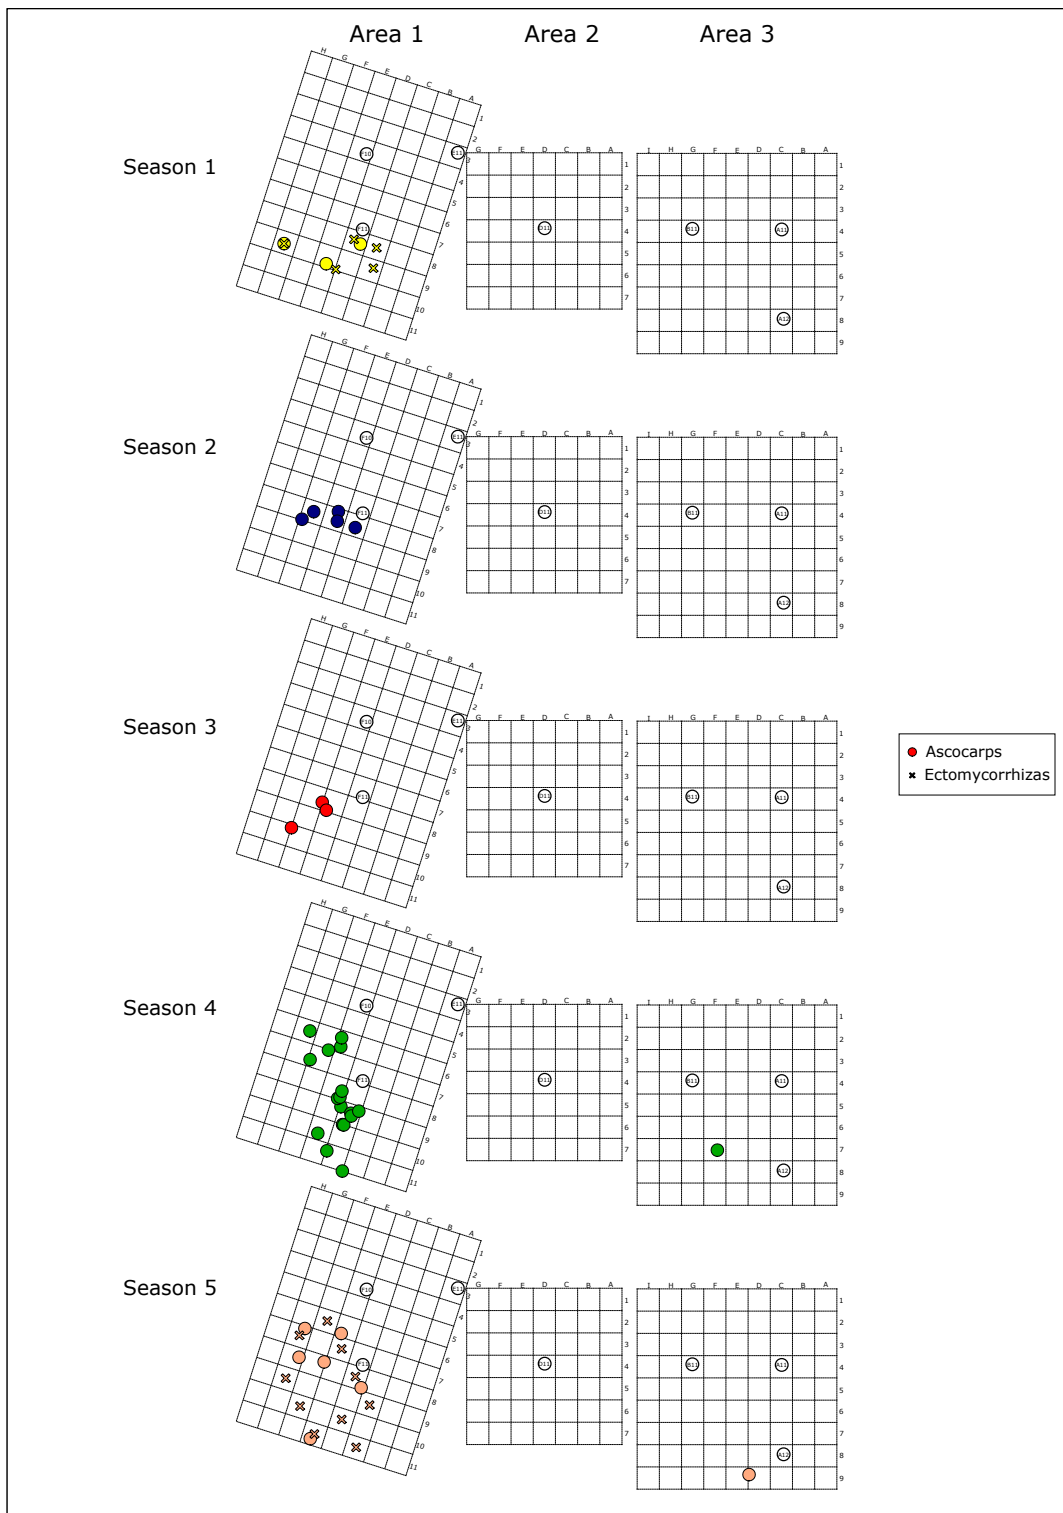

9

10 Figure S3. Map of distribution of the mating type in female elements. Ascocarps are  
 11 represented as dots and ectomycorrhizas as crosses. *MATI-1* is represented in green and  
 12 *MATI-2* in blue.

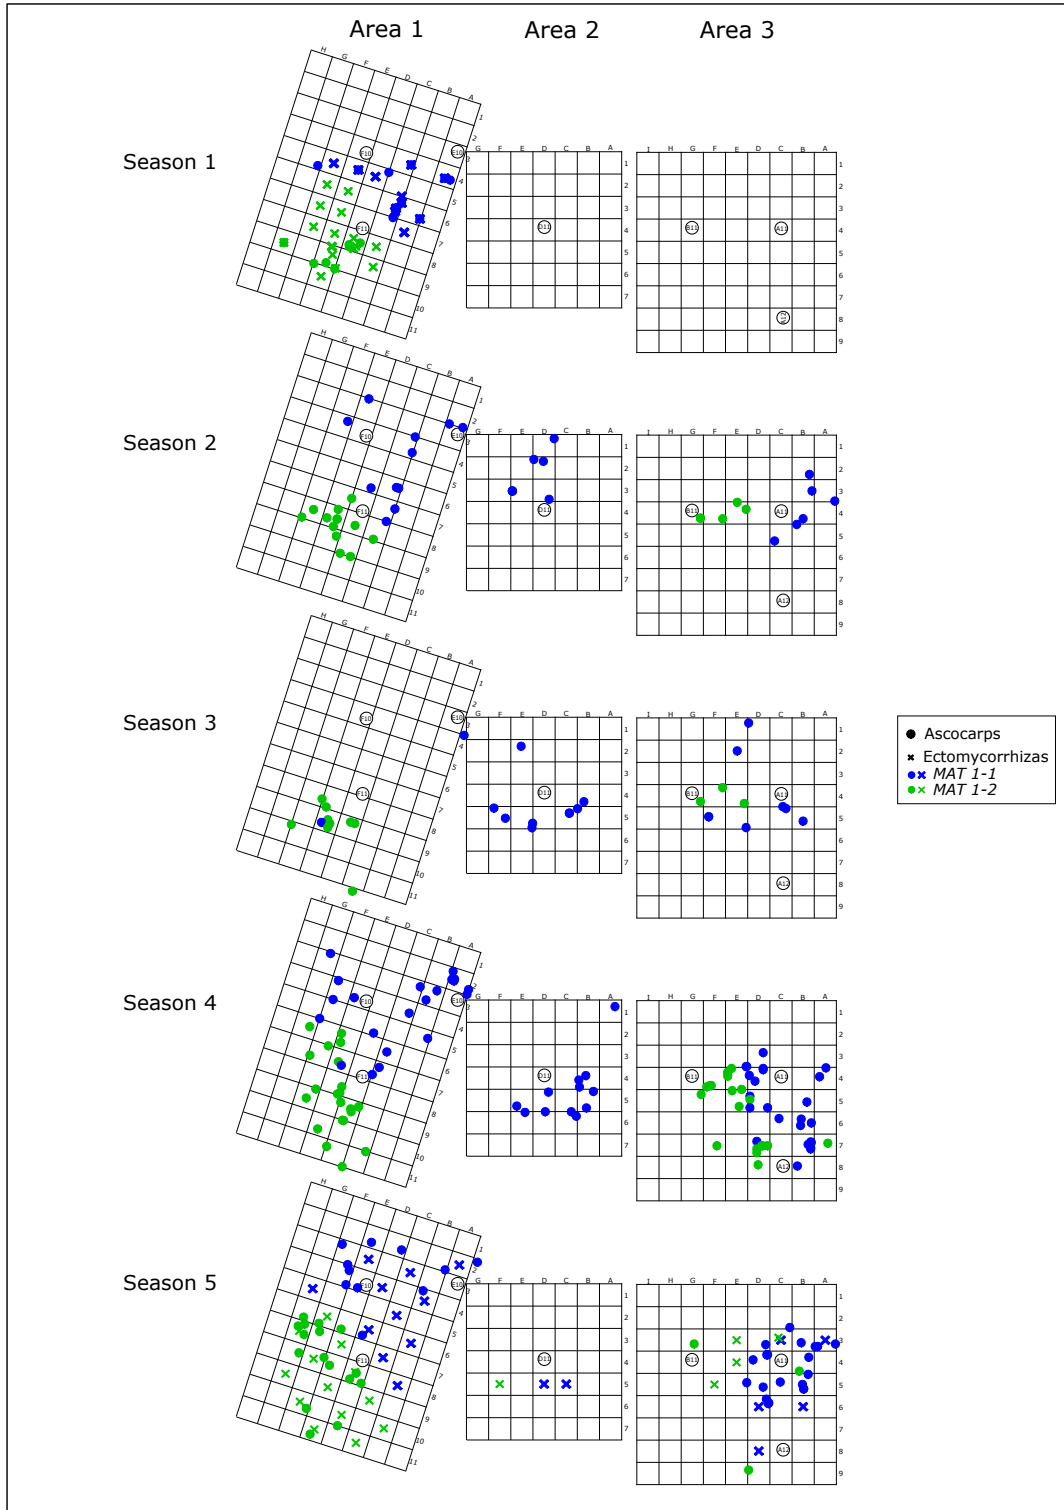

13

14 Figure S4. Kinship coefficient calculated for each pair of genotypes (female and male)  
15 in all 206 zygotes analysed.

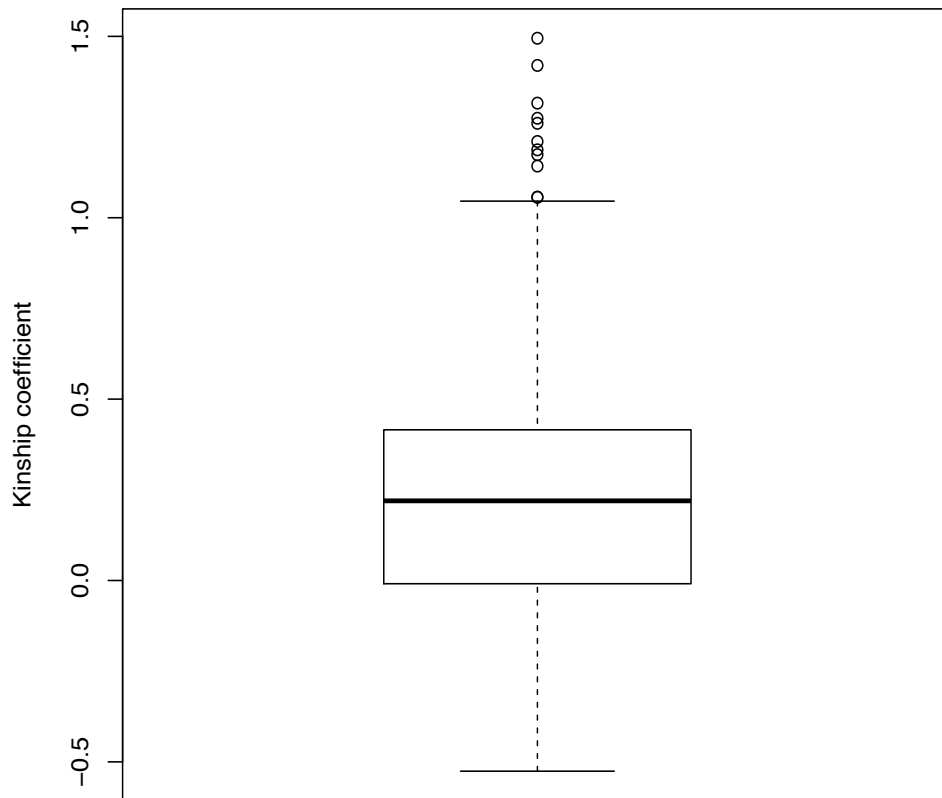

16

17

18 Figure S5. Map of the perennial male strain (R102) in the Rollainville orchard. This  
19 genotype was detected only as male element in four seasons. Each season is represented  
20 by a different colour.

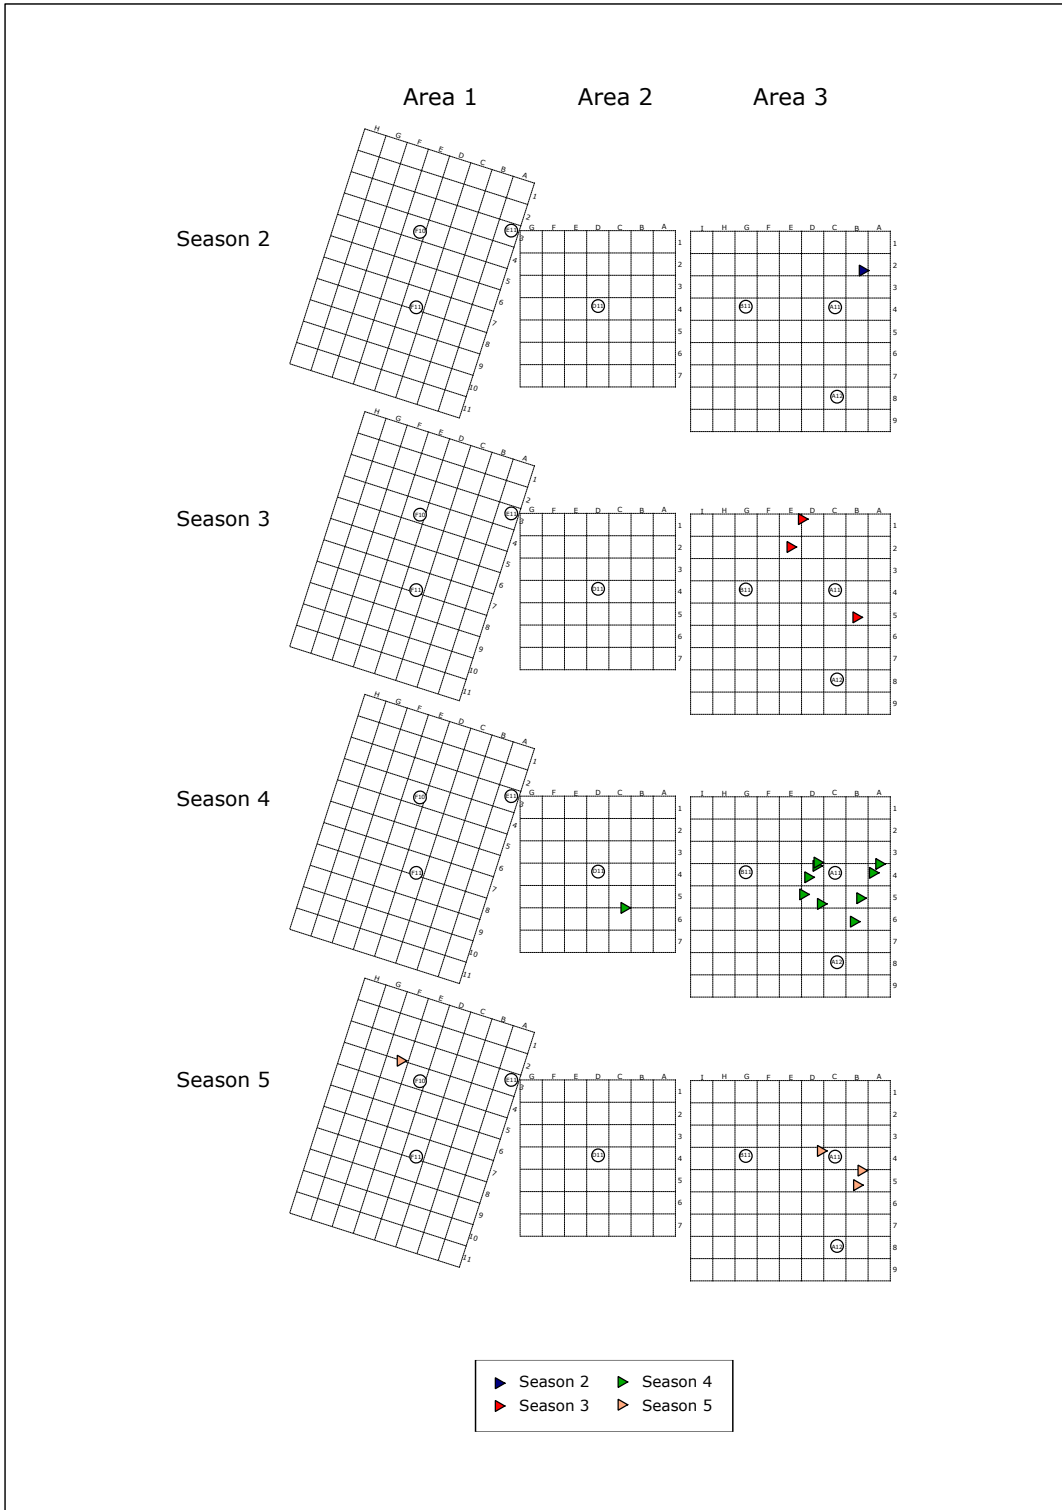

21

Table S1: Summary of all genotyped samples with their localisation in the truffle orchard. Coordinates in the square are indicated, as well as the coordinate in the orchards used for isolation by distance analysis. ECM: Ectomycorrhiza; MAT: mating type

| season | Sample Name | Sample type | Tm1_ATT18 | fm112_TAT1 | Tm16ATA12 | Tm2_TAT15 | n22_CCTCAT | m241_TAA1 | i269_TGTTG | m75_GAAA | Tm9_ATCA | 12Tm98_TAT15 | MAT | GENOTYPE | Area | Plot | x-square | y-square | x-map | y-map |
|--------|-------------|-------------|-----------|------------|-----------|-----------|------------|-----------|------------|----------|----------|--------------|-----|----------|------|------|----------|----------|-------|-------|
| 1      | 101025-1    | Female      | 345       | 248        | 172       | 207       | 324        | 253       | 374        | 327      | 338      | 225          | 2   | R001     | 3    | E5   | 36       | 43 7.15  | 24.48 |       |
| 1      | 101025-2    | Female      | 345       | 248        | 172       | 207       | 324        | 253       | 374        | 327      | 338      | 225          | 2   | R001     | 3    | G5   | 15       | 82 6.93  | 26.46 |       |
| 1      | 101222-1    | Female      | 305       | 248        | 172       | 207       | 360        | 256       | 374        | 327      | 330      | 225          | 1   | R002     | 3    | D8   | 25       | 56 10.43 | 24.26 |       |
| 1      | 101222-1    | Male        | 345       | 248        | 172       | 177       | 360        | 256       | 374        | 327      | 330      | 225          | 2   | R078     | 3    | D8   | 25       | 56 10.43 | 24.26 |       |
| 1      | 101222-2    | Female      | 305       | 248        | 172       | 207       | 360        | 256       | 374        | 327      | 330      | 225          | 1   | R002     | 3    | G9   | 55       | 56 10.31 | 28.00 |       |
| 1      | 101222-2    | Male        | 356       | 248        | 172       | 168       | 330        | 256       | 386        | 327      | 330      | 225          | 2   | R079     | 3    | G9   | 55       | 56 10.31 | 28.00 |       |
| 1      | 101222-3    | Female      | 345       | 248        | 172       | 165       | 342        | 253       | 374        | 339      | 330      | 225          | 2   | R003     | 3    | B6   | 3        | 71 9.40  | 21.40 |       |
| 1      | 101222-3    | Male        | 345       | 248        | 172       | 165       | 330        | 256       | 374        | 339      | 330      | 228          | 1   | R080     | 3    | B6   | 3        | 71 9.40  | 21.40 |       |
| 1      | 101222-4    | Female      | 345       | 269        | 172       | 165       | 330        | 256       | 374        | 339      | 330      | 228          | 2   | R004     | 3    | A4   | 51       | 63 7.62  | 20.24 |       |
| 1      | 101222-5    | Female      | 305       | 248        | 172       | 207       | 360        | 253       | 374        | 327      | 330      | 225          | 1   | R005     | 3    | D8   | 64       | 86 10.60 | 24.75 |       |
| 1      | 101222-5    | Male        | 345       | 248        | 172       | 165       | 342        | 256       | 374        | 327      | 330      | 225          | 2   | R069     | 3    | D8   | 64       | 86 10.60 | 24.75 |       |
| 1      | 101222-6    | Female      | 305       | 248        | 172       | 165       | 342        | 253       | 374        | 339      | 330      | 225          | 2   | R006     | 3    | A4   | 26       | 63 7.70  | 19.98 |       |
| 1      | 101222-6    | Male        | 345       | 248        | 172       | 207       | 360        | 256       | 374        | 327      | 330      | 225          | 1   | R081     | 3    | A4   | 26       | 63 7.70  | 19.98 |       |
| 1      | 101229-1    | Female      | 305       | 248        | 172       | 207       | 360        | 256       | 374        | 327      | 330      | 225          | 1   | R002     | 3    | E9   | 47       | 86 11.25 | 25.88 |       |
| 1      | 101229-1    | Male        | 305       | 248        | 172       | 207       | 360        | 256       | 374        | 327      | 330      | 225          | 2   | R082     | 3    | E9   | 47       | 86 11.25 | 25.88 |       |
| 1      | 101229-2    | Female      | 345       | 248        | 172       | 207       | 330        | 256       | 374        | 339      | 330      | 225          | 2   | R007     | 3    | C5   | 98       | 12 7.29  | 22.99 |       |
| 1      | 101229-2    | Male        | 345       | 248        | 175       | 177       | 324        | 256       | 374        | 327      | 330      | 225          | 1   | R083     | 3    | C5   | 98       | 12 7.29  | 22.99 |       |
| 1      | 110108-1    | Female      | 305       | 248        | 172       | 207       | 360        | 253       | 374        | 327      | 330      | 225          | 1   | R005     | 3    | E10  | 99       | 5 11.27  | 26.49 |       |
| 1      | 110108-1    | Male        | 305       | 248        | 172       | 177       | 330        | 256       | 374        | 327      | 330      | 225          | 2   | R084     | 3    | E10  | 99       | 5 11.27  | 26.49 |       |
| 1      | 110122-1    | Female      | 305       | 248        | 172       | 207       | 360        | 253       | 374        | 327      | 330      | 225          | 1   | R005     | 3    | D8   | 70       | 78 10.48 | 24.75 |       |
| 1      | 110122-1    | Male        | 345       | 248        | 172       | 177       | 360        | 256       | 374        | 327      | 330      | 225          | 2   | R078     | 3    | D8   | 70       | 78 10.48 | 24.75 |       |
| 1      | 110122-2    | Female      | 345       | 248        | 172       | 207       | 330        | 256       | 374        | 339      | 330      | 225          | 2   | R007     | 3    | C4   | 14       | 50 6.98  | 21.93 |       |
| 1      | 110122-2    | Male        | 345       | 248        | 172       | 207       | 330        | 256       | 374        | 327      | 330      | 225          | 1   | R085     | 3    | C4   | 14       | 50 6.98  | 21.93 |       |
| 1      | 110122-3    | Female      | 345       | 248        | 172       | 165       | 342        | 253       | 374        | 339      | 330      | 225          | 2   | R003     | 3    | C6   | 3        | 27 8.71  | 22.31 |       |
| 1      | 110122-3    | Male        | 345       | 248        | 172       | 165       | 330        | 256       | 374        | 327      | 306      | 225          | 1   | R086     | 3    | C6   | 3        | 27 8.71  | 22.31 |       |
| 1      | 110122-4    | Female      | 305       | 248        | 172       | 207       | 360        | 253       | 374        | 327      | 330      | 225          | 1   | R005     | 3    | E9   | 1        | 99 11.55 | 25.45 |       |
| 1      | 110122-4    | Male        | 305       | 248        | 172       | 207       | 360        | 256       | 374        | 327      | 330      | 225          | 2   | R082     | 3    | E9   | 1        | 99 11.55 | 25.45 |       |
| 1      | 110127-1    | Female      | 345       | 248        | 172       | 165       | 342        | 253       | 374        | 339      | 330      | 225          | 2   | R003     | 3    | C6   | 16       | 55 8.88  | 22.52 |       |
| 1      | 110127-1    | Male        | 345       | 248        | 172       | 165       | 324        | 256       | 386        | 327      | 330      | 225          | 1   | R087     | 3    | C6   | 16       | 55 8.88  | 22.52 |       |
| 1      | 110127-2    | Female      | 345       | 248        | 172       | 165       | 342        | 253       | 374        | 339      | 330      | 225          | 2   | R003     | 3    | C7   | 20       | 2 9.31   | 22.70 |       |
| 1      | 110127-2    | Male        | 345       | 248        | 172       | 165       | 324        | 256       | 374        | 327      | 330      | 225          | 1   | R088     | 3    | C7   | 20       | 2 9.31   | 22.70 |       |
| 1      | A4-1        | ECM         | 345       | 269        | 172       | 165       | 330        | 256       | 374        | 339      | 330      | 228          | 2   | R004     | 3    | A4   | 51       | 63 7.62  | 20.24 |       |
| 1      | A4-2        | ECM         | 345       | 269        | 172       | 165       | 330        | 256       | 374        | 339      | 330      | 228          | 2   | R004     | 3    | A4   | 51       | 63 7.62  | 20.24 |       |
| 1      | A4-3        | ECM         | 345       | 269        | 172       | 165       | 330        | 256       | 374        | 339      | 330      | 228          | 2   | R004     | 3    | A4   | 51       | 63 7.62  | 20.24 |       |
| 1      | B6-1        | ECM         | 345       | 248        | 172       | 165       | 342        | 253       | 374        | 339      | 330      | 225          | 2   | R003     | 3    | B6   | 3        | 71 9.40  | 21.40 |       |
| 1      | B6-2        | ECM         | 345       | 248        | 172       | 165       | 342        | 253       | 374        | 339      | 330      | 225          | 2   | R003     | 3    | B6   | 3        | 71 9.40  | 21.40 |       |
| 1      | B6-3        | ECM         | 345       | 248        | 172       | 165       | 342        | 253       | 374        | 339      | 330      | 225          | 2   | R003     | 3    | B6   | 3        | 71 9.40  | 21.40 |       |
| 1      | B7-1        | ECM         | 345       | 248        | 172       | 165       | 342        | 253       | 374        | 339      | 330      | 225          | 2   | R003     | 3    | B7   | 50       | 50 9.98  | 22.10 |       |
| 1      | B7-2        | ECM         | 345       | 248        | 172       | 165       | 342        | 253       | 374        | 339      | 330      | 225          | 2   | R003     | 3    | B7   | 50       | 50 9.98  | 22.10 |       |
| 1      | B7-3        | ECM         | 345       | 248        | 172       | 165       | 342        | 253       | 374        | 339      | 330      | 225          | 2   | R003     | 3    | B7   | 50       | 50 9.98  | 22.10 |       |
| 1      | C4-1        | ECM         | 345       | 248        | 172       | 207       | 330        | 256       | 374        | 339      | 330      | 225          | 2   | R007     | 3    | C4   | 14       | 50 6.98  | 21.93 |       |
| 1      | C4-2        | ECM         | 345       | 248        | 172       | 207       | 330        | 256       | 374        | 339      | 330      | 225          | 2   | R007     | 3    | C4   | 14       | 50 6.98  | 21.93 |       |
| 1      | C4-3        | ECM         | 345       | 248        | 172       | 207       | 330        | 256       | 374        | 339      | 330      | 225          | 2   | R007     | 3    | C4   | 14       | 50 6.98  | 21.93 |       |
| 1      | C5-1        | ECM         | 345       | 248        | 172       | 207       | 330        | 256       | 374        | 339      | 330      | 225          | 2   | R007     | 3    | C5   | 12       | 98 8.38  | 22.33 |       |
| 1      | C5-2        | ECM         | 345       | 248        | 172       | 207       | 330        | 256       | 374        | 339      | 330      | 225          | 2   | R007     | 3    | C5   | 12       | 98 8.38  | 22.33 |       |
| 1      | C5-3        | ECM         | 345       | 248        | 172       | 207       | 330        | 256       | 374        | 339      | 330      | 225          | 2   | R007     | 3    | C5   | 12       | 98 8.38  | 22.33 |       |
| 1      | C6-1-1      | ECM         | 345       | 248        | 172       | 165       | 342        | 253       | 374        | 339      | 330      | 225          | 2   | R003     | 3    | C6   | 3        | 27 8.71  | 22.31 |       |
| 1      | C6-1-2      | ECM         | 345       | 248        | 172       | 165       | 342        | 253       | 374        | 339      | 330      | 225          | 2   | R003     | 3    | C6   | 3        | 27 8.71  | 22.31 |       |
| 1      | C6-1-3      | ECM         | 345       | 248        | 172       | 165       | 342        | 253       | 374        | 339      | 330      | 225          | 2   | R003     | 3    | C6   | 3        | 27 8.71  | 22.31 |       |
| 1      | C6-2-1      | ECM         | 345       | 248        | 172       | 165       | 342        | 253       | 374        | 339      | 330      | 225          | 2   | R003     | 3    | C6   | 20       | 60 8.91  | 22.57 |       |
| 1      | C6-2-2      | ECM         | 345       | 248        | 172       | 165       | 342        | 253       | 374        | 339      | 330      | 225          | 2   | R003     | 3    | C6   | 20       | 60 8.91  | 22.57 |       |
| 1      | C6-2-3      | ECM         | 345       | 248        | 172       | 165       | 342        | 253       | 374        | 339      | 330      | 225          | 2   | R003     | 3    | C6   | 20       | 60 8.91  | 22.57 |       |
| 1      | C6-3-1      | ECM         | 345       | 248        | 172       | 207       | 342        | 253       | 374        | 339      | 330      | 225          | 2   | R008     | 3    | C6   | 20       | 75 9.05  | 22.62 |       |
| 1      | C6-3-2      | ECM         | 345       | 248        | 172       | 207       | 342        | 253       | 374        | 339      | 330      | 225          | 2   | R008     | 3    | C6   | 20       | 75 9.05  | 22.62 |       |

|   |          |        |     |     |     |     |     |     |     |     |     |     |   |      |   |     |    |          |       |
|---|----------|--------|-----|-----|-----|-----|-----|-----|-----|-----|-----|-----|---|------|---|-----|----|----------|-------|
| 1 | C6-3-3   | ECM    | 345 | 248 | 172 | 207 | 342 | 253 | 374 | 339 | 330 | 225 | 2 | R008 | 3 | C6  | 20 | 75 9.05  | 22.62 |
| 1 | C8-1     | ECM    | 305 | 248 | 172 | 207 | 360 | 256 | 374 | 327 | 330 | 225 | 1 | R002 | 3 | C8  | 50 | 50 10.60 | 23.46 |
| 1 | C8-2     | ECM    | 305 | 248 | 172 | 207 | 360 | 256 | 374 | 327 | 330 | 225 | 1 | R002 | 3 | C8  | 50 | 50 10.60 | 23.46 |
| 1 | C8-3     | ECM    | 305 | 248 | 172 | 207 | 360 | 256 | 374 | 327 | 330 | 225 | 1 | R002 | 3 | C8  | 50 | 50 10.60 | 23.46 |
| 1 | C9-1     | ECM    | 305 | 248 | 172 | 207 | 360 | 256 | 374 | 327 | 330 | 225 | 1 | R002 | 3 | C9  | 37 | 40 11.53 | 23.59 |
| 1 | C9-2     | ECM    | 305 | 248 | 172 | 207 | 360 | 256 | 374 | 327 | 330 | 225 | 1 | R002 | 3 | C9  | 37 | 40 11.53 | 23.59 |
| 1 | C9-3     | ECM    | 305 | 248 | 172 | 207 | 360 | 256 | 374 | 327 | 330 | 225 | 1 | R002 | 3 | C9  | 37 | 40 11.53 | 23.59 |
| 1 | D5-1     | ECM    | 345 | 248 | 172 | 210 | 360 | 256 | 374 | 339 | 330 | 225 | 2 | R009 | 3 | D5  | 50 | 50 7.49  | 23.62 |
| 1 | D5-2     | ECM    | 345 | 248 | 172 | 210 | 360 | 256 | 374 | 339 | 330 | 225 | 2 | R009 | 3 | D5  | 50 | 50 7.49  | 23.62 |
| 1 | D5-3     | ECM    | 345 | 248 | 172 | 210 | 360 | 256 | 374 | 339 | 330 | 225 | 2 | R009 | 3 | D5  | 50 | 50 7.49  | 23.62 |
| 1 | D8-1-1   | ECM    | 305 | 248 | 172 | 207 | 360 | 256 | 374 | 327 | 330 | 225 | 1 | R002 | 3 | D8  | 60 | 45 10.22 | 24.55 |
| 1 | D8-1-2   | ECM    | 305 | 248 | 172 | 207 | 360 | 253 | 374 | 327 | 330 | 225 | 1 | R005 | 3 | D8  | 60 | 45 10.22 | 24.55 |
| 1 | D8-1-3   | ECM    | 305 | 248 | 172 | 207 | 360 | 253 | 374 | 327 | 330 | 225 | 1 | R005 | 3 | D8  | 60 | 45 10.22 | 24.55 |
| 1 | D8-2-1   | ECM    | 305 | 248 | 172 | 207 | 360 | 253 | 374 | 327 | 330 | 225 | 1 | R005 | 3 | D8  | 40 | 75 10.56 | 24.50 |
| 1 | D8-2-2   | ECM    | 305 | 248 | 172 | 207 | 360 | 253 | 374 | 327 | 330 | 225 | 1 | R005 | 3 | D8  | 40 | 75 10.56 | 24.50 |
| 1 | D8-2-3   | ECM    | 305 | 248 | 172 | 207 | 360 | 253 | 374 | 327 | 330 | 225 | 1 | R005 | 3 | D8  | 40 | 75 10.56 | 24.50 |
| 1 | D8-3-1   | ECM    | 305 | 248 | 172 | 207 | 360 | 253 | 374 | 327 | 330 | 225 | 1 | R005 | 3 | D8  | 45 | 90 10.69 | 24.58 |
| 1 | D8-3-2   | ECM    | 305 | 248 | 172 | 207 | 360 | 253 | 374 | 327 | 330 | 225 | 1 | R005 | 3 | D8  | 45 | 90 10.69 | 24.58 |
| 1 | D8-3-3   | ECM    | 305 | 248 | 172 | 207 | 360 | 253 | 374 | 327 | 330 | 225 | 1 | R005 | 3 | D8  | 45 | 90 10.69 | 24.58 |
| 1 | D9-1     | ECM    | 305 | 248 | 172 | 207 | 360 | 256 | 374 | 327 | 330 | 225 | 1 | R002 | 3 | D9  | 95 | 95 11.54 | 25.36 |
| 1 | D9-2     | ECM    | 305 | 248 | 172 | 207 | 360 | 256 | 374 | 327 | 330 | 225 | 1 | R002 | 3 | D9  | 95 | 95 11.54 | 25.36 |
| 1 | D9-3     | ECM    | 305 | 248 | 172 | 207 | 360 | 256 | 374 | 327 | 330 | 225 | 1 | R002 | 3 | D9  | 95 | 95 11.54 | 25.36 |
| 1 | E10-1    | ECM    | 305 | 248 | 172 | 207 | 360 | 253 | 374 | 327 | 330 | 225 | 1 | R005 | 3 | E10 | 50 | 50 11.87 | 26.11 |
| 1 | E10-2    | ECM    | 305 | 248 | 172 | 207 | 360 | 253 | 374 | 327 | 330 | 225 | 1 | R005 | 3 | E10 | 50 | 50 11.87 | 26.11 |
| 1 | E10-3    | ECM    | 305 | 248 | 172 | 207 | 360 | 253 | 374 | 327 | 330 | 225 | 1 | R005 | 3 | E10 | 50 | 50 11.87 | 26.11 |
| 1 | E5-1     | ECM    | 345 | 248 | 172 | 207 | 324 | 253 | 374 | 327 | 338 | 225 | 2 | R001 | 3 | E5  | 36 | 43 7.15  | 24.48 |
| 1 | E5-2     | ECM    | 345 | 248 | 172 | 207 | 324 | 253 | 374 | 327 | 338 | 225 | 2 | R001 | 3 | E5  | 36 | 43 7.15  | 24.48 |
| 1 | E5-3     | ECM    | 345 | 248 | 172 | 207 | 324 | 253 | 374 | 327 | 338 | 225 | 2 | R001 | 3 | E5  | 36 | 43 7.15  | 24.48 |
| 1 | E6-1     | ECM    | 305 | 248 | 172 | 165 | 360 | 256 | 374 | 327 | 330 | 225 | 1 | R010 | 3 | E6  | 50 | 50 8.09  | 24.93 |
| 1 | E6-2     | ECM    | 305 | 248 | 172 | 165 | 360 | 256 | 374 | 327 | 330 | 225 | 1 | R010 | 3 | E6  | 50 | 50 8.09  | 24.93 |
| 1 | E6-3     | ECM    | 305 | 248 | 172 | 165 | 360 | 256 | 374 | 327 | 330 | 225 | 1 | R010 | 3 | E6  | 50 | 50 8.09  | 24.93 |
| 1 | E7-1     | ECM    | 305 | 248 | 172 | 207 | 360 | 253 | 374 | 327 | 330 | 225 | 1 | R005 | 3 | E7  | 50 | 50 9.01  | 25.22 |
| 1 | E7-2     | ECM    | 305 | 248 | 172 | 207 | 360 | 253 | 374 | 327 | 330 | 225 | 1 | R005 | 3 | E7  | 50 | 50 9.01  | 25.22 |
| 1 | E7-3     | ECM    | 305 | 248 | 172 | 207 | 360 | 253 | 374 | 327 | 330 | 225 | 1 | R005 | 3 | E7  | 50 | 50 9.01  | 25.22 |
| 1 | E8-1     | ECM    | 305 | 248 | 172 | 207 | 360 | 253 | 374 | 327 | 330 | 225 | 1 | R005 | 3 | E8  | 50 | 50 9.96  | 25.52 |
| 1 | E8-2     | ECM    | 305 | 248 | 172 | 207 | 360 | 253 | 374 | 327 | 330 | 225 | 1 | R005 | 3 | E8  | 50 | 50 9.96  | 25.52 |
| 1 | E8-3     | ECM    | 305 | 248 | 172 | 207 | 360 | 253 | 374 | 327 | 330 | 225 | 1 | R005 | 3 | E8  | 50 | 50 9.96  | 25.52 |
| 1 | E9-1-1   | ECM    | 305 | 248 | 172 | 207 | 360 | 253 | 374 | 327 | 330 | 225 | 1 | R005 | 3 | E9  | 43 | 10 10.57 | 25.63 |
| 1 | E9-1-2   | ECM    | 305 | 248 | 172 | 207 | 360 | 253 | 374 | 327 | 330 | 225 | 1 | R005 | 3 | E9  | 43 | 10 10.57 | 25.63 |
| 1 | E9-1-3   | ECM    | 305 | 248 | 172 | 207 | 360 | 253 | 374 | 327 | 330 | 225 | 1 | R005 | 3 | E9  | 43 | 10 10.57 | 25.63 |
| 1 | E9-2-1   | ECM    | 305 | 248 | 172 | 207 | 360 | 253 | 374 | 327 | 330 | 225 | 1 | R005 | 3 | E9  | 30 | 42 10.91 | 25.57 |
| 1 | E9-2-2   | ECM    | 305 | 248 | 172 | 207 | 360 | 253 | 374 | 327 | 330 | 225 | 1 | R005 | 3 | E9  | 30 | 42 10.91 | 25.57 |
| 1 | E9-2-3   | ECM    | 305 | 248 | 172 | 207 | 360 | 253 | 374 | 327 | 330 | 225 | 1 | R005 | 3 | E9  | 30 | 42 10.91 | 25.57 |
| 1 | F5-1     | ECM    | 345 | 248 | 172 | 207 | 324 | 253 | 374 | 327 | 338 | 225 | 2 | R001 | 3 | F5  | 50 | 50 6.84  | 25.71 |
| 1 | F5-2     | ECM    | 345 | 248 | 172 | 207 | 324 | 253 | 374 | 327 | 338 | 225 | 2 | R001 | 3 | F5  | 50 | 50 6.84  | 25.71 |
| 1 | F5-3     | ECM    | 345 | 248 | 172 | 207 | 324 | 253 | 374 | 327 | 338 | 225 | 2 | R001 | 3 | F5  | 50 | 50 6.84  | 25.71 |
| 1 | F6-1     | ECM    | 305 | 248 | 172 | 207 | 360 | 253 | 374 | 327 | 330 | 225 | 1 | R005 | 3 | F6  | 50 | 50 7.76  | 26.00 |
| 1 | F6-2     | ECM    | 305 | 248 | 172 | 207 | 360 | 253 | 374 | 327 | 330 | 225 | 1 | R005 | 3 | F6  | 50 | 50 7.76  | 26.00 |
| 1 | F6-3     | ECM    | 305 | 248 | 172 | 207 | 360 | 253 | 374 | 327 | 330 | 225 | 1 | R005 | 3 | F6  | 50 | 50 7.76  | 26.00 |
| 1 | F7-1     | ECM    | 305 | 248 | 172 | 207 | 360 | 253 | 374 | 327 | 330 | 225 | 1 | R005 | 3 | F7  | 50 | 50 8.67  | 26.28 |
| 1 | F7-2     | ECM    | 305 | 248 | 172 | 207 | 360 | 253 | 374 | 327 | 330 | 225 | 1 | R005 | 3 | F7  | 50 | 50 8.67  | 26.28 |
| 1 | F7-3     | ECM    | 305 | 248 | 172 | 207 | 360 | 253 | 374 | 327 | 330 | 225 | 1 | R005 | 3 | F7  | 50 | 50 8.67  | 26.28 |
| 1 | F8-1     | ECM    | 305 | 248 | 172 | 207 | 360 | 253 | 374 | 327 | 330 | 225 | 1 | R005 | 3 | F8  | 50 | 50 9.63  | 26.58 |
| 1 | F8-2     | ECM    | 305 | 248 | 172 | 207 | 360 | 253 | 374 | 327 | 330 | 225 | 1 | R005 | 3 | F8  | 50 | 50 9.63  | 26.58 |
| 1 | F8-3     | ECM    | 305 | 248 | 172 | 207 | 360 | 253 | 374 | 327 | 330 | 225 | 1 | R005 | 3 | F8  | 50 | 50 9.63  | 26.58 |
| 1 | G9-1     | ECM    | 305 | 248 | 172 | 207 | 360 | 256 | 374 | 327 | 330 | 225 | 1 | R002 | 3 | G9  | 55 | 56 10.31 | 28.00 |
| 1 | G9-2     | ECM    | 305 | 248 | 172 | 207 | 360 | 256 | 374 | 327 | 330 | 225 | 1 | R002 | 3 | G9  | 55 | 56 10.31 | 28.00 |
| 1 | G9-3     | ECM    | 305 | 248 | 172 | 207 | 360 | 256 | 374 | 327 | 330 | 225 | 1 | R002 | 3 | G9  | 55 | 56 10.31 | 28.00 |
| 2 | 111027-1 | Female | 305 | 248 | 172 | 207 | 360 | 256 | 374 | 327 | 330 | 225 | 1 | R002 | 3 | F8  | 50 | 50 9.63  | 26.58 |
| 2 | 111128-1 | Female | 305 | 254 | 172 | 156 | 330 | 256 | 374 | 339 | 330 | 204 | 2 | R025 | 2 | D1  | 4  | 17 6.74  | 15.50 |
| 2 | 111128-2 | Female | 305 | 254 | 172 | 156 | 330 | 256 | 374 | 339 | 330 | 204 | 2 | R025 | 2 | D2  | 98 | 10 7.66  | 16.38 |

|   |           |        |     |     |     |     |     |     |     |     |     |     |   |      |   |    |    |           |       |
|---|-----------|--------|-----|-----|-----|-----|-----|-----|-----|-----|-----|-----|---|------|---|----|----|-----------|-------|
| 2 | 111128-3  | Female | 345 | 248 | 172 | 165 | 342 | 253 | 374 | 339 | 330 | 225 | 2 | R003 | 3 | C8 | 20 | 1 10.26   | 23.00 |
| 2 | 111215-1  | Female | 305 | 248 | 172 | 207 | 360 | 256 | 374 | 327 | 424 | 225 | 1 | R011 | 3 | C8 | 50 | 95 11.04  | 23.60 |
| 2 | 111215-1  | Male   | 305 | 248 | 175 | 177 | 360 | 256 | 374 | 327 | 330 | 225 | 2 | R089 | 3 | C8 | 50 | 95 11.04  | 23.60 |
| 2 | 111224-1  | Female | 345 | 248 | 172 | 207 | 324 | 256 | 386 | 339 | 330 | 225 | 2 | R017 | 3 | E3 | 65 | 1 4.74    | 24.05 |
| 2 | 111224-10 | Female | 305 | 248 | 172 | 207 | 360 | 256 | 422 | 327 | 330 | 225 | 1 | R013 | 3 | E9 | 17 | 32 10.83  | 25.43 |
| 2 | 111224-10 | Male   | 305 | 248 | 172 | 156 | 360 | 256 | 374 | 339 | 334 | 225 | 2 | R093 | 3 | E9 | 17 | 32 10.83  | 25.43 |
| 2 | 111224-3  | Female | 345 | 248 | 172 | 165 | 342 | 253 | 374 | 339 | 330 | 225 | 2 | R003 | 3 | C7 | 0  | 36 9.70   | 22.62 |
| 2 | 111224-3  | Male   | 305 | 248 | 172 | 207 | 342 | 256 | 374 | 339 | 330 | 225 | 1 | R207 | 3 | C7 | 0  | 36 9.70   | 22.62 |
| 2 | 111224-4  | Female | 305 | 248 | 172 | 207 | 360 | 256 | 374 | 327 | 330 | 225 | 1 | R002 | 3 | F8 | 89 | 96 9.94   | 27.12 |
| 2 | 111224-4  | Male   | 345 | 248 | 172 | 207 | 324 | 256 | 374 | 327 | 322 | 225 | 2 | R208 | 3 | F8 | 89 | 96 9.94   | 27.12 |
| 2 | 111224-6  | Female | 305 | 254 | 172 | 207 | 360 | 256 | 374 | 327 | 330 | 225 | 1 | R012 | 3 | E8 | 40 | 94 10.43  | 25.54 |
| 2 | 111224-6  | Male   | 305 | 248 | 172 | 177 | 360 | 256 | 374 | 327 | 330 | 225 | 2 | R090 | 3 | E8 | 40 | 94 10.43  | 25.54 |
| 2 | 111224-7  | Female | 305 | 248 | 172 | 207 | 360 | 256 | 374 | 327 | 330 | 225 | 1 | R002 | 3 | E8 | 44 | 16 9.65   | 25.34 |
| 2 | 111224-7  | Male   | 305 | 248 | 172 | 177 | 360 | 256 | 374 | 327 | 330 | 225 | 2 | R090 | 3 | E8 | 44 | 16 9.65   | 25.34 |
| 2 | 111224-8  | Female | 305 | 248 | 172 | 207 | 360 | 256 | 374 | 327 | 330 | 225 | 1 | R002 | 3 | E8 | 36 | 57 10.08  | 25.39 |
| 2 | 111224-8  | Male   | 345 | 251 | 172 | 207 | 330 | 256 | 374 | 327 | 334 | 225 | 2 | R091 | 3 | E8 | 36 | 57 10.08  | 25.39 |
| 2 | 111224-9  | Female | 305 | 248 | 172 | 207 | 360 | 256 | 374 | 327 | 330 | 225 | 1 | R002 | 3 | E8 | 36 | 57 10.08  | 25.39 |
| 2 | 111224-9  | Male   | 305 | 248 | 172 | 177 | 330 | 253 | 374 | 327 | 330 | 225 | 2 | R092 | 3 | E8 | 36 | 57 10.08  | 25.39 |
| 2 | 120116-1  | Female | 345 | 248 | 172 | 165 | 342 | 253 | 374 | 339 | 330 | 225 | 2 | R003 | 3 | C6 | 11 | 39 8.78   | 22.45 |
| 2 | 120116-1  | Male   | 305 | 248 | 172 | 165 | 330 | 256 | 374 | 339 | 322 | 225 | 1 | R094 | 3 | C6 | 11 | 39 8.78   | 22.45 |
| 2 | 120116-10 | Female | 305 | 254 | 172 | 156 | 330 | 256 | 374 | 339 | 330 | 204 | 2 | R025 | 2 | E3 | 94 | 53 9.04   | 17.30 |
| 2 | 120116-10 | Male   | 305 | 266 | 172 | 207 | 330 | 256 | 374 | 339 | 330 | 225 | 1 | R102 | 2 | E3 | 94 | 53 9.04   | 17.30 |
| 2 | 120116-11 | Female | 345 | 269 | 172 | 207 | 330 | 256 | 362 | 327 | 330 | 204 | 1 | R022 | 1 | G4 | 15 | 72 10.39  | 7.89  |
| 2 | 120116-11 | Male   | 305 | 251 | 172 | 156 | 330 | 256 | 374 | 339 | 330 | 225 | 2 | R061 | 1 | G4 | 15 | 72 10.39  | 7.89  |
| 2 | 120116-2  | Female | 345 | 248 | 172 | 207 | 324 | 256 | 374 | 327 | 330 | 225 | 2 | R021 | 1 | C5 | 76 | 76 11.35  | 4.55  |
| 2 | 120116-2  | Male   | 305 | 248 | 172 | 207 | 324 | 256 | 374 | 327 | 330 | 225 | 1 | R095 | 1 | C5 | 76 | 76 11.35  | 4.55  |
| 2 | 120116-3  | Female | 345 | 248 | 172 | 207 | 324 | 256 | 374 | 327 | 330 | 225 | 2 | R021 | 1 | B4 | 48 | 75 10.43  | 3.28  |
| 2 | 120116-3  | Male   | 345 | 248 | 172 | 174 | 342 | 256 | 374 | 339 | 342 | 225 | 1 | R096 | 1 | B4 | 48 | 75 10.43  | 3.28  |
| 2 | 120116-4  | Female | 285 | 242 | 172 | 156 | 330 | 256 | 374 | 339 | 330 | 204 | 2 | R026 | 2 | E3 | 94 | 53 9.04   | 17.30 |
| 2 | 120116-4  | Male   | 305 | 251 | 172 | 207 | 324 | 256 | 374 | 327 | 330 | 204 | 1 | R097 | 2 | E3 | 94 | 53 9.04   | 17.30 |
| 2 | 120116-5  | Female | 345 | 248 | 172 | 207 | 324 | 256 | 374 | 327 | 330 | 225 | 2 | R021 | 1 | B4 | 77 | 100 10.66 | 3.59  |
| 2 | 120116-5  | Male   | 345 | 248 | 172 | 156 | 324 | 256 | 374 | 327 | 330 | 225 | 1 | R098 | 1 | B4 | 77 | 100 10.66 | 3.59  |
| 2 | 120116-6  | Female | 305 | 254 | 172 | 156 | 330 | 256 | 374 | 339 | 330 | 204 | 2 | R025 | 2 | E3 | 94 | 53 9.04   | 17.30 |
| 2 | 120116-6  | Male   | 305 | 251 | 172 | 207 | 330 | 256 | 374 | 339 | 330 | 204 | 1 | R099 | 2 | E3 | 94 | 53 9.04   | 17.30 |
| 2 | 120116-7  | Female | 305 | 248 | 172 | 207 | 360 | 256 | 374 | 327 | 330 | 225 | 1 | R002 | 3 | D8 | 46 | 60 10.40  | 24.49 |
| 2 | 120116-7  | Male   | 305 | 248 | 172 | 177 | 360 | 256 | 374 | 327 | 330 | 225 | 2 | R090 | 3 | D8 | 46 | 60 10.40  | 24.49 |
| 2 | 120116-8  | Female | 345 | 248 | 172 | 207 | 330 | 256 | 374 | 339 | 330 | 225 | 2 | R007 | 3 | D6 | 30 | 80 8.72   | 23.80 |
| 2 | 120116-9  | Female | 345 | 269 | 172 | 207 | 330 | 256 | 362 | 327 | 330 | 204 | 1 | R022 | 1 | G4 | 15 | 72 10.39  | 7.89  |
| 2 | 120116-9  | Male   | 345 | 257 | 172 | 213 | 330 | 256 | 362 | 339 | 330 | 204 | 2 | R101 | 1 | G4 | 15 | 72 10.39  | 7.89  |
| 2 | 120130-1  | Female | 345 | 248 | 172 | 207 | 324 | 256 | 374 | 327 | 330 | 225 | 2 | R021 | 1 | B2 | 19 | 75 8.51   | 3.01  |
| 2 | 120130-1  | Male   | 345 | 248 | 172 | 177 | 324 | 256 | 374 | 327 | 330 | 225 | 1 | R103 | 1 | B2 | 19 | 75 8.51   | 3.01  |
| 2 | 120130-2  | Female | 345 | 248 | 172 | 207 | 324 | 256 | 374 | 327 | 330 | 225 | 2 | R021 | 1 | B3 | 10 | 50 9.20   | 2.90  |
| 2 | 120130-2  | Male   | 305 | 269 | 172 | 174 | 324 | 256 | 374 | 327 | 330 | 225 | 1 | R104 | 1 | B3 | 10 | 50 9.20   | 2.90  |
| 2 | 120130-3  | Female | 345 | 251 | 172 | 207 | 360 | 256 | 374 | 339 | 330 | 204 | 2 | R027 | 2 | D2 | 53 | 18 7.74   | 15.92 |
| 2 | 120130-3  | Male   | 305 | 251 | 172 | 153 | 330 | 256 | 374 | 339 | 330 | 225 | 1 | R105 | 2 | D2 | 53 | 18 7.74   | 15.92 |
| 2 | 120130-4  | Female | 305 | 248 | 172 | 165 | 360 | 256 | 374 | 339 | 330 | 225 | 1 | R014 | 3 | D9 | 25 | 99 11.79  | 24.68 |
| 2 | 120130-4  | Male   | 305 | 248 | 172 | 207 | 360 | 256 | 374 | 327 | 330 | 225 | 2 | R082 | 3 | D9 | 25 | 99 11.79  | 24.68 |
| 2 | 120130-5  | Female | 305 | 248 | 172 | 165 | 360 | 256 | 374 | 339 | 330 | 225 | 1 | R014 | 3 | D7 | 99 | 50 9.17   | 24.71 |
| 2 | 120130-5  | Male   | 305 | 266 | 172 | 174 | 324 | 256 | 374 | 327 | 330 | 225 | 2 | R107 | 3 | D7 | 99 | 50 9.17   | 24.71 |
| 2 | 120130-6  | Female | 305 | 248 | 172 | 207 | 342 | 256 | 374 | 327 | 330 | 225 | 1 | R015 | 3 | E8 | 80 | 65 10.00  | 25.89 |
| 2 | 120130-6  | Male   | 345 | 248 | 172 | 174 | 318 | 256 | 374 | 327 | 330 | 225 | 2 | R108 | 3 | E8 | 80 | 65 10.00  | 25.89 |
| 2 | 120130-7  | Female | 345 | 248 | 172 | 165 | 342 | 253 | 374 | 339 | 330 | 225 | 2 | R003 | 3 | C6 | 23 | 40 8.75   | 22.56 |
| 2 | 120130-7  | Male   | 305 | 248 | 172 | 165 | 342 | 256 | 374 | 339 | 330 | 225 | 1 | R109 | 3 | C6 | 23 | 40 8.75   | 22.56 |
| 2 | 120130-8  | Female | 345 | 248 | 172 | 207 | 330 | 256 | 374 | 339 | 330 | 225 | 2 | R007 | 3 | C3 | 10 | 100 6.52  | 21.71 |
| 2 | 120130-8  | Male   | 345 | 248 | 172 | 207 | 330 | 256 | 374 | 339 | 330 | 225 | 1 | R110 | 3 | C3 | 10 | 100 6.52  | 21.71 |
| 2 | 120219-1  | Female | 305 | 248 | 172 | 207 | 360 | 250 | 374 | 327 | 330 | 225 | 1 | R023 | 1 | F4 | 15 | 75 10.43  | 6.89  |
| 2 | 120219-1  | Male   | 332 | 251 | 172 | 207 | 342 | 256 | 374 | 339 | 322 | 225 | 2 | R111 | 1 | F4 | 15 | 75 10.43  | 6.89  |
| 2 | 120225-1  | Female | 345 | 272 | 172 | 207 | 330 | 256 | 374 | 327 | 330 | 231 | 2 | R018 | 3 | A2 | 21 | 95 6.15   | 19.42 |
| 2 | 120225-1  | Male   | 345 | 269 | 172 | 165 | 330 | 256 | 362 | 339 | 330 | 225 | 1 | R112 | 3 | A2 | 21 | 95 6.15   | 19.42 |
| 2 | 120225-2  | Female | 345 | 272 | 172 | 207 | 330 | 256 | 374 | 327 | 330 | 231 | 2 | R018 | 3 | A2 | 82 | 99 5.98   | 20.09 |
| 2 | 120225-2  | Male   | 345 | 269 | 172 | 165 | 354 | 256 | 362 | 327 | 330 | 225 | 1 | R113 | 3 | A2 | 82 | 99 5.98   | 20.09 |



|   |           |        |     |     |     |     |     |     |     |     |     |     |   |      |   |     |     |          |       |
|---|-----------|--------|-----|-----|-----|-----|-----|-----|-----|-----|-----|-----|---|------|---|-----|-----|----------|-------|
| 2 | 120225-3  | Female | 305 | 230 | 172 | 207 | 360 | 256 | 374 | 327 | 330 | 225 | 1 | R016 | 3 | D9  | 72  | 99 11.64 | 25.16 |
| 2 | 120225-3  | Male   | 352 | 245 | 172 | 207 | 360 | 256 | 350 | 327 | 394 | 225 | 2 | R114 | 3 | D9  | 72  | 99 11.64 | 25.16 |
| 2 | 120225-4  | Female | 345 | 248 | 172 | 156 | 330 | 256 | 374 | 339 | 330 | 225 | 2 | R019 | 3 | C4  | 1   | 70 7.21  | 21.84 |
| 2 | 120225-5  | Female | 345 | 248 | 172 | 156 | 324 | 256 | 374 | 339 | 338 | 225 | 2 | R020 | 3 | F4  | 24  | 24 5.72  | 25.04 |
| 2 | 120225-5  | Male   | 345 | 248 | 169 | 162 | 330 | 253 | 362 | 327 | 330 | 225 | 1 | R115 | 3 | F4  | 24  | 24 5.72  | 25.04 |
| 2 | 120225-6  | Female | 345 | 248 | 172 | 207 | 324 | 256 | 374 | 327 | 330 | 225 | 2 | R021 | 1 | A3  | 7   | 96 9.66  | 1.90  |
| 2 | 120225-6  | Male   | 345 | 269 | 172 | 207 | 330 | 256 | 374 | 327 | 326 | 225 | 1 | R116 | 1 | A3  | 7   | 96 9.66  | 1.90  |
| 2 | 120225-7  | Female | 345 | 269 | 172 | 207 | 360 | 256 | 362 | 327 | 330 | 204 | 1 | R024 | 1 | E4  | 6   | 31 10.00 | 5.86  |
| 2 | 120225-7  | Male   | 345 | 248 | 172 | 153 | 330 | 256 | 374 | 339 | 330 | 204 | 2 | R117 | 1 | E4  | 6   | 31 10.00 | 5.86  |
| 2 | 120225-8  | Female | 345 | 269 | 172 | 207 | 330 | 256 | 362 | 327 | 330 | 204 | 1 | R022 | 1 | E4  | 45  | 1 9.70   | 6.24  |
| 2 | 120225-8  | Male   | 345 | 266 | 172 | 165 | 342 | 256 | 362 | 327 | 330 | 225 | 2 | R118 | 1 | E4  | 45  | 1 9.70   | 6.24  |
| 2 | 120225-9  | Female | 305 | 254 | 172 | 207 | 330 | 256 | 374 | 339 | 330 | 225 | 2 | R028 | 2 | D3  | 27  | 89 9.39  | 15.73 |
| 2 | 120225-9  | Male   | 305 | 248 | 172 | 207 | 324 | 256 | 374 | 339 | 330 | 204 | 1 | R120 | 2 | D3  | 27  | 89 9.39  | 15.73 |
| 3 | 121128-1  | Female | 345 | 269 | 172 | 165 | 330 | 256 | 374 | 339 | 330 | 228 | 2 | R004 | 3 | Z3  | 79  | 100 7.28 | 19.29 |
| 3 | 121128-1  | Male   | 305 | 248 | 172 | 207 | 360 | 256 | 374 | 327 | 330 | 228 | 1 | R121 | 3 | Z3  | 79  | 100 7.28 | 19.29 |
| 3 | 121128-2  | Female | 305 | 248 | 172 | 207 | 342 | 256 | 374 | 327 | 330 | 225 | 2 | R032 | 2 | B4  | 70  | 80 10.23 | 14.15 |
| 3 | 121128-2  | Male   | 345 | 266 | 172 | 174 | 360 | 253 | 374 | 339 | 330 | 225 | 1 | R122 | 2 | B4  | 70  | 80 10.23 | 14.15 |
| 3 | 130104-1  | Female | 309 | 248 | 172 | 207 | 342 | 256 | 374 | 327 | 330 | 225 | 2 | R031 | 2 | B5  | 98  | 10 10.54 | 14.46 |
| 3 | 130104-1  | Male   | 309 | 248 | 172 | 177 | 330 | 253 | 374 | 327 | 330 | 225 | 1 | R123 | 2 | B5  | 98  | 10 10.54 | 14.46 |
| 3 | 130104-2  | Female | 301 | 248 | 172 | 207 | 360 | 256 | 374 | 327 | 330 | 225 | 1 | R030 | 3 | E9  | 46  | 68 11.11 | 25.83 |
| 3 | 130104-2  | Male   | 345 | 248 | 172 | 207 | 360 | 256 | 374 | 327 | 330 | 225 | 2 | R124 | 3 | E9  | 46  | 68 11.11 | 25.83 |
| 3 | 130104-3  | Female | 309 | 248 | 172 | 165 | 342 | 253 | 374 | 327 | 322 | 225 | 2 | R033 | 2 | C5  | 35  | 32 10.73 | 14.80 |
| 3 | 130104-3  | Male   | 309 | 248 | 172 | 174 | 324 | 253 | 374 | 339 | 330 | 225 | 1 | R125 | 2 | C5  | 35  | 32 10.73 | 14.80 |
| 3 | 130104-4  | Female | 305 | 248 | 172 | 207 | 360 | 256 | 374 | 327 | 330 | 225 | 1 | R002 | 3 | F10 | 100 | 15 11.04 | 27.59 |
| 3 | 130104-4  | Male   | 352 | 248 | 172 | 207 | 360 | 256 | 362 | 327 | 338 | 225 | 2 | R126 | 3 | F10 | 100 | 15 11.04 | 27.59 |
| 3 | 130104-5  | Female | 305 | 248 | 175 | 207 | 342 | 253 | 374 | 327 | 334 | 225 | 2 | R034 | 2 | C5  | 33  | 32 10.73 | 14.80 |
| 3 | 130104-5  | Male   | 305 | 248 | 175 | 177 | 342 | 256 | 374 | 339 | 334 | 225 | 1 | R127 | 2 | C5  | 33  | 32 10.73 | 14.80 |
| 3 | 130104-6  | Female | 325 | 248 | 172 | 207 | 360 | 256 | 374 | 327 | 330 | 225 | 1 | R029 | 3 | E9  | 44  | 68 11.12 | 25.80 |
| 3 | 130104-6  | Male   | 352 | 248 | 172 | 207 | 330 | 256 | 374 | 327 | 322 | 225 | 2 | R128 | 3 | E9  | 44  | 68 11.12 | 25.80 |
| 3 | 130202-1  | Female | 325 | 251 | 172 | 156 | 330 | 256 | 374 | 339 | 330 | 252 | 2 | R035 | 2 | F5  | 77  | 7 10.50  | 18.15 |
| 3 | 130202-1  | Male   | 305 | 248 | 172 | 156 | 330 | 256 | 374 | 327 | 330 | 252 | 1 | R129 | 2 | F5  | 77  | 7 10.50  | 18.15 |
| 3 | 130202-10 | Female | 305 | 266 | 172 | 171 | 330 | 256 | 362 | 327 | 326 | 225 | 1 | R036 | 1 | G4  | 13  | 74 10.39 | 7.89  |
| 3 | 130202-10 | Male   | 345 | 248 | 172 | 207 | 360 | 256 | 374 | 327 | 330 | 225 | 2 | R136 | 1 | G4  | 13  | 74 10.39 | 7.89  |
| 3 | 130202-11 | Female | 301 | 248 | 175 | 192 | 330 | 256 | 362 | 327 | 334 | 249 | 1 | R037 | 1 | F5  | 77  | 44 11.08 | 7.51  |
| 3 | 130202-11 | Male   | 345 | 266 | 175 | 177 | 330 | 256 | 374 | 339 | 334 | 225 | 2 | R137 | 1 | F5  | 77  | 44 11.08 | 7.51  |
| 3 | 130202-2  | Female | 305 | 248 | 172 | 156 | 330 | 253 | 374 | 339 | 330 | 249 | 2 | R038 | 2 | E5  | 3   | 76 11.16 | 16.42 |
| 3 | 130202-2  | Male   | 345 | 251 | 172 | 153 | 324 | 256 | 374 | 339 | 330 | 225 | 1 | R130 | 2 | E5  | 3   | 76 11.16 | 16.42 |
| 3 | 130202-3  | Female | 305 | 248 | 172 | 207 | 360 | 256 | 374 | 327 | 330 | 225 | 1 | R002 | 3 | F8  | 4   | 66 9.92  | 26.15 |
| 3 | 130202-3  | Male   | 352 | 254 | 178 | 159 | 336 | 256 | 374 | 323 | 338 | 225 | 2 | R131 | 3 | F8  | 4   | 66 9.92  | 26.15 |
| 3 | 130202-4  | Female | 301 | 248 | 172 | 171 | 360 | 256 | 374 | 327 | 330 | 225 | 1 | R039 | 3 | C12 | 46  | 18 14.09 | 24.51 |
| 3 | 130202-4  | Male   | 345 | 248 | 172 | 207 | 360 | 256 | 374 | 327 | 330 | 225 | 2 | R124 | 3 | C12 | 46  | 18 14.09 | 24.51 |
| 3 | 130202-5  | Female | 345 | 269 | 172 | 165 | 330 | 256 | 374 | 339 | 330 | 228 | 2 | R004 | 3 | X3  | 21  | 68 7.82  | 16.52 |
| 3 | 130202-5  | Male   | 345 | 251 | 172 | 162 | 324 | 256 | 374 | 339 | 326 | 225 | 1 | R132 | 3 | X3  | 21  | 68 7.82  | 16.52 |
| 3 | 130202-6  | Female | 325 | 266 | 172 | 207 | 330 | 256 | 362 | 327 | 330 | 231 | 2 | R040 | 1 | F5  | 77  | 42 11.04 | 7.51  |
| 3 | 130202-6  | Male   | 345 | 266 | 172 | 207 | 342 | 256 | 362 | 335 | 330 | 210 | 1 | R133 | 1 | F5  | 77  | 42 11.04 | 7.51  |
| 3 | 130202-7  | Female | 325 | 248 | 172 | 207 | 342 | 253 | 374 | 327 | 310 | 225 | 2 | R041 | 1 | E5  | 6   | 93 11.50 | 5.86  |
| 3 | 130202-7  | Male   | 345 | 269 | 172 | 177 | 324 | 253 | 374 | 327 | 330 | 225 | 1 | R134 | 1 | E5  | 6   | 93 11.50 | 5.86  |
| 3 | 130202-8  | Female | 305 | 323 | 169 | 165 | 330 | 256 | 380 | 327 | 330 | 225 | 2 | R042 | 2 | F5  | 27  | 53 10.96 | 17.65 |
| 3 | 130202-8  | Male   | 305 | 251 | 172 | 156 | 324 | 256 | 374 | 339 | 330 | 252 | 1 | R135 | 2 | F5  | 27  | 53 10.96 | 17.65 |
| 3 | 130202-9  | Female | 305 | 248 | 172 | 207 | 360 | 256 | 374 | 327 | 330 | 225 | 1 | R002 | 3 | E8  | 76  | 94 10.31 | 25.95 |
| 3 | 130202-9  | Male   | 349 | 248 | 172 | 207 | 360 | 256 | 374 | 327 | 330 | 225 | 2 | R136 | 3 | E8  | 76  | 94 10.31 | 25.95 |
| 3 | 130208-2  | Female | 305 | 248 | 172 | 207 | 330 | 256 | 374 | 327 | 330 | 225 | 1 | R043 | 1 | F4  | 15  | 11 9.81  | 6.89  |
| 3 | 130208-2  | Male   | 345 | 266 | 172 | 165 | 330 | 256 | 362 | 327 | 330 | 225 | 2 | R138 | 1 | F4  | 15  | 11 9.81  | 6.89  |
| 3 | 130217-1  | Female | 345 | 266 | 172 | 207 | 330 | 256 | 362 | 327 | 330 | 225 | 1 | R044 | 1 | E4  | 14  | 83 10.50 | 5.93  |
| 3 | 130217-1  | Male   | 305 | 248 | 172 | 207 | 360 | 256 | 374 | 327 | 330 | 225 | 2 | R082 | 1 | E4  | 14  | 83 10.50 | 5.93  |
| 3 | 130217-2  | Female | 305 | 251 | 172 | 156 | 330 | 256 | 374 | 339 | 330 | 225 | 2 | R061 | 2 | E5  | 5   | 95 11.35 | 16.46 |
| 3 | 130217-2  | Male   | 305 | 251 | 172 | 156 | 330 | 256 | 374 | 339 | 330 | 225 | 1 | R139 | 2 | E5  | 5   | 95 11.35 | 16.46 |
| 3 | 130217-3  | Female | 305 | 323 | 172 | 174 | 324 | 256 | 374 | 327 | 330 | 225 | 2 | R045 | 1 | C4  | 39  | 98 10.62 | 4.21  |
| 3 | 130217-4  | Female | 345 | 323 | 181 | 213 | 324 | 256 | 374 | 327 | 338 | 225 | 2 | R046 | 1 | B5  | 49  | 67 11.27 | 3.32  |
| 3 | 130217-4  | Male   | 345 | 248 | 172 | 177 | 324 | 256 | 374 | 327 | 330 | 225 | 1 | R103 | 1 | B5  | 49  | 67 11.27 | 3.32  |
| 3 | 130301-1  | Female | 345 | 323 | 172 | 207 | 324 | 256 | 374 | 327 | 330 | 225 | 2 | R047 | 1 | D1  | 95  | 20 7.01  | 5.74  |

|   |           |        |     |     |     |     |     |     |     |     |     |     |   |      |   |     |    |          |       |
|---|-----------|--------|-----|-----|-----|-----|-----|-----|-----|-----|-----|-----|---|------|---|-----|----|----------|-------|
| 3 | 130301-1  | Male   | 345 | 248 | 172 | 177 | 324 | 256 | 374 | 327 | 330 | 225 | 1 | R103 | 1 | D1  | 95 | 20 7.01  | 5.74  |
| 3 | 130301-2  | Female | 345 | 323 | 172 | 207 | 324 | 256 | 374 | 327 | 330 | 225 | 2 | R047 | 1 | E2  | 47 | 46 8.20  | 6.28  |
| 3 | 130301-2  | Male   | 345 | 248 | 172 | 177 | 324 | 256 | 374 | 327 | 330 | 225 | 1 | R103 | 1 | E2  | 47 | 46 8.20  | 6.28  |
| 3 | 130301-3  | Female | 301 | 248 | 172 | 207 | 360 | 256 | 374 | 327 | 330 | 225 | 1 | R030 | 3 | D9  | 46 | 25 11.02 | 24.68 |
| 3 | 130301-3  | Male   | 305 | 248 | 172 | 177 | 360 | 256 | 374 | 327 | 330 | 225 | 2 | R090 | 3 | D9  | 46 | 25 11.02 | 24.68 |
| 3 | 130301-4  | Female | 301 | 248 | 172 | 207 | 360 | 256 | 374 | 327 | 330 | 225 | 1 | R030 | 3 | D9  | 26 | 27 11.08 | 24.50 |
| 3 | 130301-4  | Male   | 301 | 248 | 172 | 177 | 330 | 256 | 374 | 327 | 330 | 225 | 2 | R140 | 3 | D9  | 26 | 27 11.08 | 24.50 |
| 3 | 130308-1  | Female | 345 | 323 | 172 | 207 | 324 | 256 | 374 | 327 | 330 | 225 | 2 | R047 | 1 | C5  | 25 | 6 10.70  | 4.05  |
| 3 | 130310-1  | Female | 305 | 248 | 172 | 165 | 330 | 256 | 374 | 327 | 330 | 225 | 2 | R048 | 3 | E9  | 65 | 67 11.05 | 26.02 |
| 3 | 130310-1  | Male   | 345 | 248 | 172 | 207 | 324 | 256 | 374 | 327 | 330 | 225 | 1 | R074 | 3 | E9  | 65 | 67 11.05 | 26.02 |
| 4 | 131115-1  | Female | 309 | 248 | 172 | 207 | 342 | 253 | 374 | 327 | 330 | 225 | 2 | R049 | 2 | B5  | 58 | 86 11.27 | 14.04 |
| 4 | 131115-1  | Male   | 305 | 248 | 172 | 177 | 342 | 253 | 374 | 327 | 330 | 225 | 1 | R141 | 2 | B5  | 58 | 86 11.27 | 14.04 |
| 4 | 131202-1  | Female | 305 | 248 | 172 | 207 | 324 | 256 | 350 | 327 | 330 | 225 | 2 | R050 | 1 | B7  | 14 | 68 13.19 | 2.98  |
| 4 | 131202-1  | Male   | 345 | 248 | 172 | 207 | 330 | 259 | 374 | 339 | 330 | 225 | 1 | R142 | 1 | B7  | 14 | 68 13.19 | 2.98  |
| 4 | 131209-1  | Female | 345 | 248 | 172 | 207 | 330 | 256 | 374 | 339 | 306 | 225 | 2 | R051 | 3 | D5  | 47 | 85 7.82  | 23.72 |
| 4 | 131209-1  | Male   | 305 | 248 | 172 | 165 | 324 | 256 | 374 | 327 | 306 | 225 | 1 | R143 | 3 | D5  | 47 | 85 7.82  | 23.72 |
| 4 | 131210-1  | Female | 305 | 248 | 172 | 207 | 360 | 256 | 374 | 327 | 330 | 225 | 1 | R002 | 3 | E6  | 77 | 75 8.22  | 25.29 |
| 4 | 131210-1  | Male   | 349 | 248 | 172 | 207 | 360 | 256 | 374 | 327 | 330 | 225 | 2 | R136 | 3 | E6  | 77 | 75 8.22  | 25.29 |
| 4 | 131210-2  | Female | 345 | 248 | 172 | 207 | 324 | 256 | 374 | 327 | 330 | 225 | 2 | R021 | 1 | D3  | 28 | 33 9.04  | 5.09  |
| 4 | 131210-2  | Male   | 345 | 248 | 172 | 207 | 330 | 256 | 374 | 320 | 330 | 225 | 1 | R144 | 1 | D3  | 28 | 33 9.04  | 5.09  |
| 4 | 131210-3  | Female | 305 | 248 | 178 | 162 | 330 | 256 | 350 | 339 | 334 | 225 | 2 | R052 | 1 | B7  | 14 | 63 13.15 | 2.98  |
| 4 | 131210-3  | Male   | 305 | 248 | 172 | 207 | 330 | 256 | 350 | 339 | 306 | 225 | 1 | R145 | 1 | B7  | 14 | 63 13.15 | 2.98  |
| 4 | 131210-4  | Female | 305 | 248 | 172 | 177 | 324 | 256 | 374 | 327 | 330 | 225 | 2 | R053 | 1 | B7  | 15 | 36 12.88 | 2.98  |
| 4 | 131210-4  | Male   | 345 | 269 | 172 | 207 | 330 | 256 | 350 | 339 | 330 | 225 | 1 | R146 | 1 | B7  | 15 | 36 12.88 | 2.98  |
| 4 | 131210-5  | Female | 309 | 248 | 172 | 207 | 342 | 253 | 374 | 327 | 330 | 225 | 2 | R049 | 2 | C6  | 25 | 1 11.43  | 14.73 |
| 4 | 131210-5  | Male   | 345 | 248 | 172 | 177 | 324 | 256 | 374 | 327 | 330 | 225 | 1 | R103 | 2 | C6  | 25 | 1 11.43  | 14.73 |
| 4 | 131210-6  | Female | 345 | 248 | 172 | 165 | 330 | 256 | 374 | 339 | 330 | 228 | 2 | R054 | 2 | A1  | 30 | 28 6.86  | 12.81 |
| 4 | 131210-6  | Male   | 345 | 248 | 172 | 165 | 330 | 256 | 374 | 339 | 306 | 228 | 1 | R147 | 2 | A1  | 30 | 28 6.86  | 12.81 |
| 4 | 131224-3  | Female | 309 | 248 | 172 | 207 | 342 | 253 | 374 | 327 | 330 | 225 | 2 | R049 | 2 | C6  | 2  | 23 11.62 | 14.50 |
| 4 | 131224-3  | Male   | 345 | 248 | 172 | 177 | 342 | 256 | 374 | 327 | 330 | 225 | 1 | R148 | 2 | C6  | 2  | 23 11.62 | 14.50 |
| 4 | 131224-4  | Female | 345 | 248 | 172 | 207 | 324 | 256 | 374 | 327 | 330 | 225 | 2 | R021 | 1 | D4  | 65 | 60 10.27 | 5.43  |
| 4 | 131224-4  | Male   | 345 | 248 | 172 | 177 | 324 | 256 | 374 | 327 | 330 | 225 | 1 | R103 | 1 | D4  | 65 | 60 10.27 | 5.43  |
| 4 | 131224-5  | Female | 345 | 248 | 172 | 207 | 324 | 256 | 374 | 327 | 334 | 225 | 1 | R055 | 1 | E5  | 36 | 77 11.35 | 6.16  |
| 4 | 131224-5  | Male   | 345 | 248 | 172 | 207 | 324 | 256 | 374 | 327 | 330 | 225 | 2 | R021 | 1 | E5  | 36 | 77 11.35 | 6.16  |
| 4 | 131229-1  | Female | 345 | 248 | 172 | 207 | 324 | 256 | 374 | 327 | 330 | 225 | 2 | R021 | 1 | C6  | 56 | 31 11.89 | 4.36  |
| 4 | 140106-1  | Female | 305 | 269 | 172 | 165 | 342 | 256 | 374 | 327 | 314 | 225 | 2 | R056 | 1 | D7  | 58 | 33 12.85 | 5.40  |
| 4 | 140106-10 | Female | 345 | 266 | 172 | 207 | 330 | 256 | 362 | 327 | 330 | 225 | 1 | R044 | 1 | D7  | 32 | 55 13.08 | 5.13  |
| 4 | 140106-11 | Female | 305 | 248 | 172 | 207 | 324 | 256 | 386 | 320 | 306 | 225 | 1 | R057 | 1 | F4  | 87 | 86 10.50 | 7.62  |
| 4 | 140106-12 | Female | 305 | 248 | 172 | 207 | 330 | 256 | 350 | 339 | 330 | 225 | 2 | R058 | 1 | B8  | 73 | 46 13.96 | 3.55  |
| 4 | 140106-2  | Female | 349 | 245 | 169 | 207 | 330 | 253 | 362 | 335 | 326 | 225 | 2 | R059 | 3 | A2  | 90 | 15 5.15  | 19.91 |
| 4 | 140106-3  | Female | 305 | 248 | 172 | 207 | 360 | 256 | 374 | 327 | 330 | 225 | 1 | R002 | 3 | F7  | 93 | 71 8.76  | 26.79 |
| 4 | 140106-4  | Female | 345 | 248 | 172 | 207 | 330 | 256 | 374 | 339 | 306 | 225 | 2 | R051 | 3 | C6  | 66 | 49 8.69  | 23.03 |
| 4 | 140106-5  | Female | 305 | 248 | 172 | 207 | 330 | 256 | 350 | 339 | 330 | 225 | 2 | R058 | 1 | B7  | 17 | 47 13.00 | 2.98  |
| 4 | 140106-6  | Female | 305 | 248 | 172 | 207 | 360 | 256 | 374 | 327 | 330 | 225 | 1 | R002 | 3 | D9  | 94 | 28 10.88 | 25.16 |
| 4 | 140106-7  | Female | 345 | 266 | 172 | 207 | 330 | 256 | 362 | 327 | 330 | 225 | 1 | R044 | 1 | E4  | 92 | 30 9.97  | 6.66  |
| 4 | 140106-8  | Female | 345 | 269 | 172 | 165 | 330 | 256 | 374 | 339 | 330 | 228 | 2 | R004 | 3 | B3  | 34 | 20 5.99  | 20.70 |
| 4 | 140106-9  | Female | 305 | 248 | 172 | 207 | 360 | 256 | 374 | 327 | 330 | 225 | 1 | R002 | 3 | E6  | 86 | 32 7.83  | 25.25 |
| 4 | 140109-1  | Female | 345 | 248 | 172 | 207 | 324 | 256 | 374 | 327 | 330 | 225 | 2 | R021 | 1 | A4  | 74 | 40 10.08 | 2.55  |
| 4 | 140109-1  | Male   | 345 | 248 | 172 | 177 | 324 | 256 | 374 | 327 | 330 | 225 | 1 | R103 | 1 | A4  | 74 | 40 10.08 | 2.55  |
| 4 | 140109-10 | Female | 305 | 248 | 172 | 207 | 360 | 256 | 362 | 327 | 334 | 225 | 1 | R060 | 3 | C11 | 20 | 5 13.12  | 23.89 |
| 4 | 140109-10 | Male   | 305 | 248 | 172 | 207 | 360 | 256 | 374 | 327 | 334 | 225 | 2 | R153 | 3 | C11 | 20 | 5 13.12  | 23.89 |
| 4 | 140109-11 | Female | 345 | 266 | 172 | 207 | 330 | 256 | 362 | 327 | 330 | 225 | 1 | R044 | 1 | E4  | 75 | 4 9.74   | 6.51  |
| 4 | 140109-11 | Male   | 305 | 266 | 172 | 207 | 330 | 256 | 374 | 327 | 330 | 225 | 2 | R154 | 1 | E4  | 75 | 4 9.74   | 6.51  |
| 4 | 140109-12 | Female | 345 | 266 | 172 | 207 | 330 | 256 | 362 | 327 | 330 | 225 | 1 | R044 | 1 | E5  | 70 | 4 10.70  | 6.47  |
| 4 | 140109-12 | Male   | 345 | 248 | 172 | 207 | 324 | 256 | 362 | 327 | 330 | 225 | 2 | R155 | 1 | E5  | 70 | 4 10.70  | 6.47  |
| 4 | 140109-13 | Female | 305 | 251 | 172 | 156 | 330 | 256 | 374 | 339 | 330 | 225 | 2 | R061 | 2 | E6  | 36 | 5 11.46  | 16.73 |
| 4 | 140109-13 | Male   | 305 | 266 | 172 | 207 | 330 | 256 | 374 | 339 | 330 | 225 | 1 | R102 | 2 | E6  | 36 | 5 11.46  | 16.73 |
| 4 | 140109-14 | Female | 305 | 248 | 172 | 174 | 330 | 256 | 374 | 327 | 330 | 225 | 2 | R062 | 1 | D4  | 30 | 10 9.77  | 5.09  |
| 4 | 140109-14 | Male   | 345 | 248 | 172 | 177 | 324 | 256 | 374 | 327 | 330 | 225 | 1 | R103 | 1 | D4  | 30 | 10 9.77  | 5.09  |
| 4 | 140109-15 | Female | 305 | 269 | 172 | 165 | 342 | 256 | 374 | 327 | 314 | 225 | 1 | R100 | 1 | A7  | 36 | 42 12.96 | 2.17  |
| 4 | 140109-15 | Male   | 345 | 248 | 172 | 162 | 324 | 259 | 374 | 327 | 306 | 225 | 2 | R156 | 1 | A7  | 36 | 42 12.96 | 2.17  |

|   |           |        |     |     |     |     |     |     |     |     |     |     |   |      |   |     |    |          |       |
|---|-----------|--------|-----|-----|-----|-----|-----|-----|-----|-----|-----|-----|---|------|---|-----|----|----------|-------|
| 4 | 140109-4  | Female | 345 | 248 | 172 | 207 | 330 | 256 | 374 | 327 | 330 | 225 | 2 | R063 | 3 | B3  | 69 | 75 6.39  | 21.22 |
| 4 | 140109-4  | Male   | 305 | 248 | 172 | 207 | 360 | 256 | 374 | 339 | 330 | 225 | 1 | R149 | 3 | B3  | 69 | 75 6.39  | 21.22 |
| 4 | 140109-5  | Female | 345 | 269 | 172 | 165 | 330 | 256 | 374 | 339 | 330 | 228 | 2 | R004 | 3 | Z2  | 99 | 73 6.00  | 19.13 |
| 4 | 140109-5  | Male   | 345 | 269 | 172 | 165 | 360 | 256 | 374 | 327 | 330 | 228 | 1 | R150 | 3 | Z2  | 99 | 73 6.00  | 19.13 |
| 4 | 140109-6  | Female | 305 | 248 | 172 | 156 | 330 | 256 | 350 | 327 | 330 | 225 | 2 | R064 | 1 | B6  | 11 | 51 12.08 | 2.94  |
| 4 | 140109-6  | Male   | 345 | 251 | 172 | 207 | 324 | 256 | 374 | 339 | 306 | 225 | 1 | R151 | 1 | B6  | 11 | 51 12.08 | 2.94  |
| 4 | 140109-7  | Female | 305 | 248 | 175 | 174 | 336 | 256 | 380 | 331 | 330 | 225 | 2 | R065 | 1 | D4  | 29 | 2 9.70   | 5.09  |
| 4 | 140109-7  | Male   | 345 | 248 | 172 | 177 | 324 | 256 | 374 | 327 | 330 | 225 | 1 | R103 | 1 | D4  | 29 | 2 9.70   | 5.09  |
| 4 | 140109-8  | Female | 309 | 248 | 172 | 207 | 342 | 253 | 374 | 327 | 330 | 225 | 2 | R049 | 2 | B4  | 59 | 36 9.85  | 14.08 |
| 4 | 140109-8  | Male   | 309 | 248 | 172 | 177 | 342 | 253 | 374 | 327 | 330 | 225 | 1 | R152 | 2 | B4  | 59 | 36 9.85  | 14.08 |
| 4 | 140128-1  | Female | 345 | 269 | 172 | 165 | 330 | 256 | 374 | 339 | 330 | 228 | 2 | R004 | 3 | A2  | 74 | 55 5.56  | 19.88 |
| 4 | 140128-1  | Male   | 345 | 269 | 169 | 165 | 360 | 256 | 374 | 339 | 330 | 225 | 1 | R157 | 3 | A2  | 74 | 55 5.56  | 19.88 |
| 4 | 140128-10 | Female | 345 | 269 | 172 | 165 | 330 | 256 | 374 | 339 | 330 | 228 | 2 | R004 | 3 | A2  | 73 | 47 5.50  | 19.82 |
| 4 | 140128-10 | Male   | 345 | 248 | 172 | 165 | 330 | 256 | 374 | 339 | 330 | 228 | 1 | R080 | 3 | A2  | 74 | 55 5.56  | 19.88 |
| 4 | 140128-11 | Female | 345 | 248 | 172 | 207 | 324 | 253 | 374 | 327 | 338 | 225 | 2 | R001 | 3 | E4  | 82 | 63 6.23  | 24.71 |
| 4 | 140128-12 | Female | 345 | 248 | 172 | 207 | 342 | 256 | 374 | 327 | 330 | 225 | 2 | R066 | 3 | G3  | 43 | 6 4.20   | 25.93 |
| 4 | 140128-12 | Male   | 305 | 248 | 172 | 165 | 330 | 256 | 374 | 339 | 306 | 225 | 1 | R161 | 3 | G3  | 43 | 6 4.20   | 25.93 |
| 4 | 140128-13 | Female | 345 | 248 | 172 | 207 | 324 | 256 | 374 | 327 | 330 | 225 | 2 | R021 | 1 | E3  | 4  | 94 9.62  | 5.86  |
| 4 | 140128-13 | Male   | 345 | 248 | 172 | 177 | 330 | 256 | 374 | 327 | 330 | 225 | 1 | R210 | 1 | E3  | 4  | 94 9.62  | 5.86  |
| 4 | 140128-14 | Female | 345 | 248 | 172 | 207 | 330 | 256 | 374 | 339 | 330 | 225 | 2 | R007 | 3 | C4  | 22 | 53 6.99  | 22.01 |
| 4 | 140128-14 | Male   | 345 | 248 | 172 | 177 | 330 | 256 | 374 | 339 | 330 | 225 | 1 | R162 | 3 | C4  | 22 | 53 6.99  | 22.01 |
| 4 | 140128-15 | Female | 305 | 248 | 172 | 207 | 360 | 256 | 374 | 327 | 330 | 225 | 1 | R002 | 3 | D10 | 62 | 2 11.71  | 25.06 |
| 4 | 140128-15 | Male   | 305 | 248 | 172 | 177 | 360 | 256 | 374 | 327 | 330 | 225 | 2 | R090 | 3 | D10 | 62 | 2 11.71  | 25.06 |
| 4 | 140128-16 | Female | 345 | 266 | 172 | 207 | 330 | 256 | 362 | 327 | 330 | 225 | 1 | R044 | 1 | E4  | 92 | 20 9.89  | 6.66  |
| 4 | 140128-16 | Male   | 345 | 269 | 172 | 177 | 330 | 256 | 374 | 327 | 330 | 225 | 2 | R163 | 1 | E4  | 92 | 20 9.89  | 6.66  |
| 4 | 140128-17 | Female | 345 | 248 | 172 | 207 | 324 | 256 | 374 | 327 | 330 | 225 | 2 | R021 | 1 | A4  | 45 | 1 9.70   | 2.29  |
| 4 | 140128-17 | Male   | 345 | 248 | 172 | 177 | 324 | 256 | 374 | 327 | 330 | 225 | 1 | R103 | 1 | A4  | 45 | 1 9.70   | 2.29  |
| 4 | 140128-18 | Female | 305 | 248 | 172 | 156 | 330 | 256 | 374 | 327 | 330 | 225 | 1 | R067 | 3 | F9  | 21 | 7 10.28  | 26.42 |
| 4 | 140128-19 | Female | 345 | 248 | 172 | 207 | 324 | 256 | 374 | 327 | 330 | 225 | 2 | R021 | 1 | D4  | 92 | 35 10.04 | 5.70  |
| 4 | 140128-19 | Male   | 345 | 269 | 172 | 177 | 324 | 256 | 374 | 327 | 330 | 225 | 1 | R164 | 1 | D4  | 92 | 35 10.04 | 5.70  |
| 4 | 140128-2  | Female | 305 | 269 | 172 | 165 | 342 | 256 | 374 | 327 | 314 | 225 | 1 | R100 | 1 | D8  | 52 | 40 13.88 | 5.32  |
| 4 | 140128-2  | Male   | 345 | 248 | 172 | 207 | 324 | 256 | 374 | 327 | 330 | 225 | 2 | R021 | 1 | D8  | 52 | 40 13.88 | 5.32  |
| 4 | 140128-20 | Female | 305 | 248 | 172 | 207 | 360 | 256 | 374 | 327 | 330 | 225 | 1 | R002 | 3 | E8  | 20 | 96 10.49 | 25.36 |
| 4 | 140128-21 | Female | 305 | 248 | 172 | 165 | 360 | 256 | 374 | 327 | 330 | 225 | 1 | R010 | 3 | E7  | 61 | 60 9.08  | 25.36 |
| 4 | 140128-21 | Male   | 305 | 248 | 172 | 207 | 360 | 256 | 374 | 327 | 330 | 225 | 2 | R082 | 3 | E7  | 61 | 60 9.08  | 25.36 |
| 4 | 140128-22 | Female | 309 | 248 | 172 | 207 | 342 | 253 | 374 | 327 | 330 | 225 | 2 | R049 | 2 | B5  | 25 | 12 10.54 | 13.73 |
| 4 | 140128-22 | Male   | 309 | 248 | 172 | 207 | 330 | 256 | 374 | 327 | 330 | 225 | 1 | R165 | 2 | B5  | 25 | 12 10.54 | 13.73 |
| 4 | 140128-23 | Female | 309 | 248 | 172 | 207 | 342 | 253 | 374 | 327 | 330 | 225 | 2 | R049 | 2 | B4  | 90 | 90 10.35 | 14.38 |
| 4 | 140128-23 | Male   | 309 | 248 | 172 | 207 | 330 | 256 | 374 | 327 | 330 | 225 | 1 | R165 | 2 | B4  | 90 | 90 10.35 | 14.38 |
| 4 | 140128-24 | Female | 305 | 248 | 172 | 207 | 360 | 256 | 374 | 327 | 330 | 225 | 1 | R002 | 3 | D10 | 56 | 3 11.74  | 24.98 |
| 4 | 140128-24 | Male   | 305 | 248 | 172 | 207 | 360 | 256 | 374 | 327 | 330 | 225 | 2 | R082 | 3 | D10 | 56 | 3 11.74  | 24.98 |
| 4 | 140128-25 | Female | 305 | 248 | 172 | 207 | 360 | 256 | 374 | 327 | 330 | 225 | 1 | R002 | 3 | E8  | 13 | 89 10.44 | 25.26 |
| 4 | 140128-26 | Female | 345 | 266 | 172 | 207 | 330 | 256 | 362 | 327 | 330 | 225 | 1 | R044 | 1 | E4  | 90 | 24 9.93  | 6.66  |
| 4 | 140128-26 | Male   | 305 | 269 | 172 | 207 | 324 | 256 | 374 | 327 | 330 | 225 | 2 | R166 | 1 | E4  | 90 | 24 9.93  | 6.66  |
| 4 | 140128-27 | Female | 305 | 269 | 172 | 165 | 342 | 256 | 374 | 327 | 314 | 225 | 1 | R100 | 1 | D7  | 33 | 53 13.04 | 5.13  |
| 4 | 140128-27 | Male   | 345 | 248 | 172 | 207 | 324 | 256 | 374 | 327 | 330 | 225 | 2 | R021 | 1 | D7  | 33 | 53 13.04 | 5.13  |
| 4 | 140128-28 | Female | 345 | 248 | 172 | 207 | 324 | 256 | 374 | 327 | 330 | 225 | 2 | R021 | 1 | B6  | 56 | 34 11.92 | 3.36  |
| 4 | 140128-28 | Male   | 345 | 269 | 172 | 207 | 324 | 256 | 374 | 327 | 330 | 225 | 1 | R209 | 1 | B6  | 56 | 34 11.92 | 3.36  |
| 4 | 140128-29 | Female | 345 | 248 | 172 | 207 | 324 | 256 | 374 | 327 | 330 | 225 | 2 | R021 | 1 | D5  | 89 | 37 11.00 | 5.70  |
| 4 | 140128-29 | Male   | 345 | 248 | 172 | 177 | 324 | 256 | 374 | 327 | 330 | 225 | 1 | R103 | 1 | D5  | 89 | 37 11.00 | 5.70  |
| 4 | 140128-3  | Female | 305 | 248 | 172 | 162 | 324 | 256 | 374 | 327 | 330 | 225 | 2 | R106 | 1 | B7  | 12 | 39 12.92 | 2.94  |
| 4 | 140128-3  | Male   | 305 | 248 | 172 | 207 | 330 | 256 | 350 | 339 | 306 | 225 | 1 | R145 | 1 | B7  | 12 | 39 12.92 | 2.94  |
| 4 | 140128-30 | Female | 305 | 248 | 172 | 207 | 360 | 256 | 374 | 327 | 330 | 225 | 1 | R002 | 3 | E8  | 14 | 60 10.18 | 25.18 |
| 4 | 140128-30 | Male   | 305 | 248 | 172 | 207 | 330 | 256 | 374 | 327 | 330 | 225 | 2 | R068 | 3 | E8  | 14 | 60 10.18 | 25.18 |
| 4 | 140128-31 | Female | 305 | 248 | 172 | 207 | 360 | 256 | 374 | 327 | 330 | 225 | 1 | R002 | 3 | D9  | 43 | 42 11.18 | 24.69 |
| 4 | 140128-31 | Male   | 305 | 248 | 172 | 207 | 360 | 256 | 374 | 327 | 330 | 225 | 2 | R082 | 3 | D9  | 43 | 42 11.18 | 24.69 |
| 4 | 140128-4  | Female | 305 | 248 | 172 | 207 | 360 | 256 | 374 | 327 | 330 | 225 | 1 | R002 | 3 | E10 | 57 | 72 12.06 | 26.25 |
| 4 | 140128-5  | Female | 305 | 248 | 172 | 207 | 360 | 256 | 374 | 327 | 330 | 225 | 1 | R002 | 3 | F7  | 27 | 4 8.31   | 25.89 |
| 4 | 140128-5  | Male   | 305 | 248 | 172 | 207 | 366 | 256 | 374 | 327 | 330 | 225 | 2 | R158 | 3 | F7  | 27 | 4 8.31   | 25.89 |
| 4 | 140128-6  | Female | 305 | 248 | 172 | 207 | 342 | 253 | 374 | 327 | 330 | 225 | 2 | R119 | 3 | G5  | 2  | 98 7.11  | 26.40 |
| 4 | 140128-7  | Female | 345 | 269 | 172 | 165 | 330 | 256 | 374 | 339 | 330 | 228 | 2 | R004 | 3 | A2  | 84 | 53 5.54  | 19.95 |

|   |           |        |     |     |     |     |     |     |     |     |     |     |   |      |   |     |    |          |       |
|---|-----------|--------|-----|-----|-----|-----|-----|-----|-----|-----|-----|-----|---|------|---|-----|----|----------|-------|
| 4 | 140128-7  | Male   | 345 | 248 | 172 | 207 | 360 | 256 | 374 | 339 | 330 | 225 | 1 | R159 | 3 | A2  | 84 | 53 5.54  | 19.95 |
| 4 | 140128-8  | Female | 345 | 248 | 172 | 207 | 330 | 256 | 374 | 339 | 306 | 225 | 2 | R051 | 3 | C7  | 77 | 28 9.37  | 23.40 |
| 4 | 140128-8  | Male   | 305 | 248 | 175 | 177 | 330 | 256 | 374 | 339 | 306 | 225 | 1 | R160 | 3 | C7  | 77 | 28 9.37  | 23.40 |
| 4 | 140128-9  | Female | 305 | 248 | 172 | 207 | 360 | 256 | 374 | 327 | 330 | 225 | 1 | R002 | 3 | D9  | 36 | 54 11.32 | 24.65 |
| 4 | 140128-9  | Male   | 345 | 248 | 172 | 207 | 360 | 256 | 374 | 327 | 330 | 225 | 2 | R124 | 3 | D9  | 36 | 54 11.32 | 24.65 |
| 4 | 140208-1  | Female | 305 | 269 | 172 | 165 | 342 | 256 | 374 | 327 | 314 | 225 | 1 | R100 | 1 | D7  | 57 | 84 13.35 | 5.36  |
| 4 | 140208-1  | Male   | 325 | 248 | 172 | 165 | 324 | 256 | 374 | 327 | 330 | 225 | 2 | R167 | 1 | D7  | 57 | 84 13.35 | 5.36  |
| 4 | 140208-2  | Female | 345 | 248 | 172 | 207 | 324 | 256 | 374 | 327 | 330 | 225 | 2 | R021 | 1 | E3  | 5  | 96 9.66  | 5.86  |
| 4 | 140208-2  | Male   | 345 | 248 | 172 | 207 | 330 | 256 | 374 | 320 | 330 | 225 | 1 | R144 | 1 | E3  | 5  | 96 9.66  | 5.86  |
| 4 | 140208-3  | Female | 345 | 248 | 172 | 207 | 330 | 256 | 374 | 327 | 330 | 225 | 2 | R063 | 3 | B5  | 8  | 35 8.14  | 21.04 |
| 4 | 140208-3  | Male   | 305 | 248 | 172 | 207 | 324 | 253 | 374 | 339 | 338 | 225 | 1 | R168 | 3 | B5  | 8  | 35 8.14  | 21.04 |
| 4 | 140208-4  | Female | 345 | 266 | 172 | 207 | 330 | 256 | 362 | 327 | 330 | 225 | 1 | R044 | 1 | F4  | 70 | 80 10.47 | 7.47  |
| 4 | 140208-4  | Male   | 345 | 266 | 172 | 165 | 342 | 256 | 362 | 327 | 330 | 225 | 2 | R118 | 1 | F4  | 70 | 80 10.47 | 7.47  |
| 4 | 140216-1  | Female | 309 | 248 | 172 | 207 | 342 | 253 | 374 | 327 | 330 | 225 | 2 | R049 | 2 | B4  | 92 | 60 10.04 | 14.38 |
| 4 | 140216-1  | Male   | 309 | 248 | 172 | 207 | 360 | 253 | 374 | 327 | 330 | 225 | 1 | R169 | 2 | B4  | 92 | 60 10.04 | 14.38 |
| 4 | 140216-10 | Female | 345 | 266 | 172 | 207 | 330 | 256 | 362 | 327 | 330 | 225 | 1 | R044 | 1 | G5  | 12 | 20 10.85 | 7.85  |
| 4 | 140216-10 | Male   | 345 | 248 | 172 | 207 | 342 | 256 | 374 | 327 | 330 | 225 | 2 | R066 | 3 | A2  | 1  | 95 6.21  | 19.24 |
| 4 | 140216-11 | Female | 345 | 269 | 172 | 165 | 330 | 256 | 374 | 339 | 330 | 228 | 2 | R004 | 3 | A2  | 1  | 95 6.21  | 19.24 |
| 4 | 140216-11 | Male   | 345 | 269 | 172 | 165 | 360 | 256 | 374 | 327 | 330 | 228 | 1 | R150 | 3 | A2  | 1  | 95 6.21  | 19.24 |
| 4 | 140216-12 | Female | 345 | 266 | 172 | 207 | 330 | 256 | 362 | 327 | 330 | 225 | 1 | R044 | 1 | E4  | 27 | 98 10.62 | 6.09  |
| 4 | 140216-12 | Male   | 305 | 248 | 172 | 162 | 324 | 256 | 374 | 327 | 330 | 225 | 2 | R106 | 1 | E4  | 27 | 98 10.62 | 6.09  |
| 4 | 140216-13 | Female | 345 | 248 | 172 | 165 | 342 | 256 | 374 | 339 | 330 | 225 | 2 | R206 | 3 | C7  | 95 | 66 9.68  | 23.70 |
| 4 | 140216-13 | Male   | 345 | 248 | 172 | 165 | 342 | 256 | 374 | 339 | 330 | 225 | 1 | R173 | 3 | C7  | 95 | 66 9.68  | 23.70 |
| 4 | 140216-14 | Female | 345 | 266 | 172 | 207 | 330 | 256 | 362 | 327 | 330 | 225 | 1 | R044 | 1 | F4  | 65 | 80 10.47 | 7.39  |
| 4 | 140216-14 | Male   | 305 | 266 | 172 | 165 | 330 | 256 | 362 | 339 | 330 | 225 | 2 | R174 | 1 | F4  | 65 | 80 10.47 | 7.39  |
| 4 | 140216-15 | Female | 345 | 248 | 172 | 207 | 330 | 256 | 374 | 327 | 330 | 225 | 2 | R063 | 3 | C3  | 10 | 25 5.79  | 21.48 |
| 4 | 140216-15 | Male   | 345 | 248 | 172 | 174 | 330 | 256 | 374 | 339 | 330 | 225 | 1 | R175 | 3 | C3  | 10 | 25 5.79  | 21.48 |
| 4 | 140216-2  | Female | 305 | 248 | 172 | 207 | 360 | 256 | 374 | 327 | 330 | 225 | 1 | R002 | 3 | G6  | 32 | 47 7.49  | 26.84 |
| 4 | 140216-2  | Male   | 305 | 248 | 172 | 207 | 360 | 256 | 374 | 327 | 330 | 225 | 2 | R082 | 3 | G6  | 32 | 47 7.49  | 26.84 |
| 4 | 140216-3  | Female | 305 | 269 | 172 | 165 | 342 | 256 | 374 | 327 | 314 | 225 | 1 | R100 | 1 | D7  | 56 | 68 13.19 | 5.36  |
| 4 | 140216-3  | Male   | 345 | 248 | 172 | 207 | 324 | 256 | 374 | 327 | 330 | 225 | 2 | R021 | 1 | D7  | 56 | 68 13.19 | 5.36  |
| 4 | 140216-4  | Female | 345 | 248 | 172 | 207 | 324 | 253 | 374 | 327 | 338 | 225 | 2 | R001 | 3 | F4  | 72 | 12 5.45  | 25.52 |
| 4 | 140216-4  | Male   | 345 | 248 | 172 | 177 | 324 | 253 | 374 | 327 | 338 | 225 | 1 | R170 | 3 | F4  | 72 | 12 5.45  | 25.52 |
| 4 | 140216-5  | Female | 345 | 266 | 172 | 207 | 330 | 256 | 362 | 327 | 330 | 225 | 1 | R044 | 1 | D5  | 90 | 43 11.08 | 5.70  |
| 4 | 140216-5  | Male   | 305 | 248 | 172 | 162 | 324 | 256 | 374 | 327 | 306 | 225 | 2 | R171 | 1 | D5  | 90 | 43 11.08 | 5.70  |
| 4 | 140216-6  | Female | 305 | 248 | 172 | 207 | 360 | 256 | 374 | 327 | 330 | 225 | 1 | R002 | 3 | D9  | 9  | 24 11.10 | 24.30 |
| 4 | 140216-7  | Female | 345 | 248 | 172 | 207 | 324 | 256 | 374 | 327 | 330 | 225 | 2 | R021 | 1 | D5  | 10 | 84 11.43 | 4.90  |
| 4 | 140216-7  | Male   | 345 | 248 | 172 | 177 | 324 | 256 | 374 | 327 | 330 | 225 | 1 | R103 | 1 | D5  | 10 | 84 11.43 | 4.90  |
| 4 | 140216-8  | Female | 345 | 248 | 172 | 207 | 324 | 256 | 374 | 327 | 330 | 225 | 2 | R021 | 1 | B6  | 60 | 63 12.19 | 3.40  |
| 4 | 140216-8  | Male   | 345 | 248 | 172 | 177 | 324 | 256 | 374 | 327 | 330 | 225 | 1 | R103 | 1 | B6  | 60 | 63 12.19 | 3.40  |
| 4 | 140216-9  | Female | 345 | 248 | 172 | 207 | 330 | 256 | 374 | 339 | 306 | 225 | 2 | R051 | 3 | E7  | 43 | 70 9.25  | 25.21 |
| 4 | 140216-9  | Male   | 345 | 248 | 175 | 174 | 330 | 256 | 374 | 327 | 330 | 225 | 1 | R172 | 3 | E7  | 43 | 70 9.25  | 25.21 |
| 4 | 140222-1  | Female | 345 | 248 | 172 | 207 | 324 | 256 | 374 | 327 | 330 | 225 | 2 | R021 | 1 | B5  | 32 | 58 11.19 | 3.13  |
| 4 | 140222-1  | Male   | 345 | 248 | 172 | 177 | 324 | 256 | 374 | 327 | 330 | 225 | 1 | R103 | 1 | B5  | 32 | 58 11.19 | 3.13  |
| 4 | 140222-2  | Female | 305 | 248 | 172 | 207 | 330 | 256 | 374 | 327 | 330 | 225 | 2 | R068 | 3 | F4  | 70 | 98 6.27  | 25.73 |
| 4 | 140222-2  | Male   | 345 | 248 | 172 | 177 | 324 | 253 | 374 | 327 | 338 | 225 | 1 | R170 | 3 | F4  | 70 | 98 6.27  | 25.73 |
| 4 | 140222-3  | Female | 305 | 248 | 172 | 156 | 330 | 256 | 374 | 327 | 330 | 225 | 1 | R067 | 3 | F9  | 50 | 58 10.65 | 26.90 |
| 4 | 140222-3  | Male   | 305 | 248 | 172 | 207 | 360 | 256 | 374 | 327 | 330 | 225 | 2 | R082 | 3 | F9  | 50 | 58 10.65 | 26.90 |
| 4 | 140222-4  | Female | 345 | 248 | 172 | 207 | 324 | 256 | 374 | 327 | 330 | 225 | 2 | R021 | 1 | D5  | 88 | 83 11.43 | 5.66  |
| 4 | 140222-4  | Male   | 305 | 248 | 172 | 207 | 324 | 256 | 374 | 327 | 334 | 225 | 1 | R176 | 1 | D5  | 88 | 83 11.43 | 5.66  |
| 4 | 140222-5  | Female | 305 | 251 | 172 | 156 | 330 | 256 | 374 | 339 | 330 | 225 | 2 | R061 | 2 | D5  | 29 | 13 10.54 | 15.73 |
| 4 | 140222-5  | Male   | 305 | 266 | 172 | 207 | 324 | 256 | 374 | 327 | 330 | 225 | 1 | R177 | 2 | D5  | 29 | 13 10.54 | 15.73 |
| 4 | 140222-6  | Female | 305 | 248 | 172 | 207 | 360 | 256 | 374 | 327 | 330 | 225 | 1 | R002 | 3 | D11 | 93 | 35 12.86 | 25.78 |
| 4 | 140222-6  | Male   | 345 | 248 | 172 | 207 | 330 | 256 | 374 | 327 | 326 | 225 | 2 | R178 | 3 | D11 | 93 | 35 12.86 | 25.78 |
| 4 | 140310-1  | Female | 305 | 251 | 172 | 156 | 330 | 256 | 374 | 339 | 330 | 225 | 2 | R061 | 2 | E5  | 75 | 75 11.16 | 17.11 |
| 4 | 140310-1  | Male   | 345 | 266 | 172 | 207 | 360 | 256 | 374 | 327 | 330 | 225 | 1 | R179 | 2 | E5  | 75 | 75 11.16 | 17.11 |
| 4 | 140310-2  | Female | 305 | 269 | 172 | 165 | 342 | 256 | 374 | 327 | 314 | 225 | 1 | R100 | 1 | D7  | 8  | 54 13.08 | 4.90  |
| 4 | 140310-2  | Male   | 345 | 248 | 172 | 165 | 324 | 256 | 374 | 335 | 330 | 225 | 2 | R180 | 1 | D7  | 8  | 54 13.08 | 4.90  |
| 4 | 140315-1  | Female | 305 | 248 | 172 | 207 | 360 | 256 | 374 | 327 | 330 | 225 | 1 | R002 | 1 | F7  | 40 | 54 13.08 | 7.16  |
| 4 | 140315-1  | Male   | 305 | 248 | 172 | 174 | 360 | 256 | 374 | 327 | 330 | 222 | 2 | R181 | 1 | F7  | 40 | 54 13.08 | 7.16  |
| 4 | 140315-2  | Female | 305 | 251 | 172 | 156 | 330 | 256 | 374 | 339 | 330 | 225 | 2 | R061 | 2 | D6  | 44 | 1 11.43  | 15.88 |

|   |           |        |     |     |     |     |     |     |     |     |     |     |   |      |   |     |     |           |       |
|---|-----------|--------|-----|-----|-----|-----|-----|-----|-----|-----|-----|-----|---|------|---|-----|-----|-----------|-------|
| 4 | 140315-2  | Male   | 305 | 248 | 172 | 207 | 360 | 256 | 374 | 327 | 330 | 222 | 1 | R182 | 2 | D6  | 44  | 1 11.43   | 15.88 |
| 4 | 140315-3  | Female | 305 | 248 | 172 | 207 | 360 | 256 | 374 | 327 | 330 | 225 | 1 | R002 | 3 | C11 | 100 | 100 13.78 | 25.02 |
| 4 | 140315-3  | Male   | 305 | 248 | 172 | 207 | 360 | 256 | 374 | 327 | 330 | 225 | 2 | R082 | 3 | C11 | 100 | 100 13.78 | 25.02 |
| 5 | 141206    | Female | 305 | 248 | 172 | 207 | 360 | 256 | 374 | 327 | 330 | 225 | 1 | R002 | 3 | G8  | 22  | 43 9.33   | 27.29 |
| 5 | 141206    | Male   | 305 | 248 | 172 | 177 | 360 | 256 | 374 | 327 | 330 | 225 | 2 | R090 | 3 | G8  | 22  | 43 9.33   | 27.29 |
| 5 | 141213    | Female | 305 | 248 | 172 | 165 | 360 | 256 | 374 | 327 | 330 | 225 | 1 | R010 | 3 | E8  | 74  | 54 9.92   | 25.78 |
| 5 | 141213    | Male   | 345 | 248 | 172 | 165 | 360 | 256 | 374 | 327 | 330 | 225 | 2 | R183 | 3 | E8  | 74  | 54 9.92   | 25.78 |
| 5 | 141224-1  | Female | 345 | 248 | 172 | 207 | 324 | 256 | 374 | 327 | 330 | 225 | 2 | R021 | 1 | E5  | 2   | 39 11.04  | 5.82  |
| 5 | 141224-1  | Male   | 305 | 248 | 172 | 177 | 324 | 259 | 374 | 327 | 330 | 225 | 1 | R184 | 1 | E5  | 2   | 39 11.04  | 5.82  |
| 5 | 141224-2  | Female | 345 | 248 | 172 | 207 | 324 | 256 | 374 | 327 | 330 | 225 | 2 | R021 | 1 | D3  | 16  | 70 9.39   | 4.97  |
| 5 | 141224-2  | Male   | 305 | 269 | 172 | 174 | 324 | 256 | 374 | 327 | 330 | 225 | 1 | R104 | 1 | D3  | 16  | 70 9.39   | 4.97  |
| 5 | 141224-3  | Female | 305 | 248 | 172 | 207 | 360 | 256 | 374 | 327 | 330 | 225 | 1 | R002 | 3 | E11 | 62  | 75 12.99  | 26.62 |
| 5 | 141224-3  | Male   | 305 | 248 | 172 | 177 | 360 | 256 | 374 | 327 | 330 | 225 | 2 | R090 | 3 | E11 | 62  | 75 12.99  | 26.62 |
| 5 | 141224-4  | Female | 345 | 248 | 172 | 165 | 342 | 256 | 374 | 327 | 330 | 225 | 2 | R069 | 3 | F4  | 19  | 22 5.73   | 25.00 |
| 5 | 141224-4  | Male   | 305 | 248 | 172 | 165 | 342 | 256 | 374 | 327 | 330 | 225 | 1 | R185 | 3 | F4  | 19  | 22 5.73   | 25.00 |
| 5 | 141226-1  | Female | 345 | 248 | 172 | 207 | 324 | 256 | 374 | 327 | 330 | 225 | 2 | R021 | 1 | C2  | 10  | 93 8.66   | 3.90  |
| 5 | 141226-1  | Male   | 345 | 248 | 172 | 207 | 330 | 256 | 374 | 327 | 330 | 225 | 1 | R085 | 1 | C2  | 10  | 93 8.66   | 3.90  |
| 5 | 141226-2  | Female | 345 | 248 | 172 | 207 | 330 | 256 | 374 | 339 | 330 | 225 | 2 | R007 | 3 | B4  | 72  | 9 6.71    | 21.36 |
| 5 | 141226-2  | Male   | 345 | 248 | 172 | 174 | 330 | 256 | 374 | 339 | 330 | 225 | 1 | R175 | 3 | B4  | 72  | 9 6.71    | 21.36 |
| 5 | 141226-3  | Female | 345 | 248 | 172 | 165 | 342 | 256 | 374 | 327 | 330 | 225 | 2 | R069 | 3 | E2  | 62  | 74 4.49   | 23.97 |
| 5 | 141226-3  | Male   | 305 | 248 | 172 | 207 | 324 | 256 | 386 | 327 | 330 | 225 | 1 | R186 | 3 | E2  | 62  | 74 4.49   | 23.97 |
| 5 | 141226-4  | Female | 345 | 248 | 172 | 207 | 324 | 256 | 386 | 339 | 330 | 225 | 2 | R017 | 3 | D2  | 18  | 63 4.85   | 22.43 |
| 5 | 141226-4  | Male   | 345 | 248 | 172 | 207 | 324 | 256 | 374 | 339 | 330 | 225 | 1 | R187 | 3 | D2  | 18  | 63 4.85   | 22.43 |
| 5 | 150110-1  | Female | 345 | 248 | 172 | 207 | 324 | 256 | 374 | 327 | 330 | 225 | 2 | R021 | 1 | D4  | 73  | 38 10.04  | 5.55  |
| 5 | 150110-1  | Male   | 305 | 248 | 172 | 153 | 324 | 256 | 374 | 327 | 330 | 225 | 1 | R188 | 1 | D4  | 73  | 38 10.04  | 5.55  |
| 5 | 150110-11 | Female | 305 | 248 | 172 | 207 | 360 | 256 | 374 | 327 | 330 | 225 | 1 | R002 | 3 | D8  | 9   | 90 10.81  | 24.21 |
| 5 | 150110-11 | Male   | 305 | 248 | 175 | 207 | 360 | 256 | 374 | 327 | 330 | 225 | 2 | R191 | 3 | D8  | 9   | 90 10.81  | 24.21 |
| 5 | 150110-2  | Female | 345 | 248 | 172 | 207 | 324 | 256 | 374 | 327 | 330 | 225 | 2 | R021 | 1 | D4  | 10  | 16 9.85   | 4.90  |
| 5 | 150110-2  | Male   | 345 | 248 | 172 | 177 | 324 | 256 | 374 | 327 | 330 | 225 | 1 | R103 | 1 | D4  | 10  | 16 9.85   | 4.90  |
| 5 | 150110-3  | Female | 345 | 248 | 172 | 207 | 324 | 256 | 374 | 327 | 330 | 225 | 2 | R021 | 1 | D4  | 12  | 16 9.85   | 4.93  |
| 5 | 150110-3  | Male   | 305 | 248 | 172 | 177 | 324 | 259 | 374 | 327 | 330 | 225 | 1 | R184 | 1 | D4  | 12  | 16 9.85   | 4.93  |
| 5 | 150110-4  | Female | 345 | 248 | 172 | 207 | 324 | 256 | 374 | 327 | 330 | 225 | 2 | R021 | 1 | D6  | 15  | 16 11.73  | 4.97  |
| 5 | 150110-4  | Male   | 345 | 248 | 172 | 177 | 330 | 256 | 374 | 327 | 330 | 225 | 1 | R210 | 1 | D6  | 15  | 16 11.73  | 4.97  |
| 5 | 150110-5  | Female | 345 | 248 | 172 | 207 | 324 | 256 | 374 | 327 | 330 | 225 | 2 | R021 | 1 | B5  | 25  | 3 10.70   | 3.05  |
| 5 | 150110-5  | Male   | 345 | 248 | 172 | 177 | 324 | 256 | 374 | 327 | 330 | 225 | 1 | R103 | 1 | B5  | 25  | 3 10.70   | 3.05  |
| 5 | 150110-6  | Female | 345 | 248 | 172 | 207 | 324 | 253 | 374 | 327 | 338 | 225 | 2 | R001 | 3 | F3  | 32  | 99 5.47   | 25.08 |
| 5 | 150110-6  | Male   | 345 | 248 | 172 | 177 | 324 | 256 | 374 | 327 | 330 | 225 | 1 | R103 | 3 | F3  | 32  | 99 5.47   | 25.08 |
| 5 | 150110-7  | Female | 345 | 248 | 172 | 207 | 324 | 253 | 374 | 327 | 338 | 225 | 2 | R001 | 3 | F4  | 13  | 88 6.38   | 25.12 |
| 5 | 150110-7  | Male   | 345 | 248 | 175 | 177 | 324 | 256 | 374 | 339 | 330 | 225 | 1 | R189 | 3 | F4  | 13  | 88 6.38   | 25.12 |
| 5 | 150110-8  | Female | 305 | 248 | 172 | 207 | 360 | 256 | 374 | 327 | 330 | 225 | 1 | R002 | 1 | D9  | 95  | 36 14.80  | 5.74  |
| 5 | 150110-8  | Male   | 305 | 248 | 175 | 177 | 330 | 256 | 374 | 327 | 330 | 225 | 2 | R190 | 1 | D9  | 95  | 36 14.80  | 5.74  |
| 5 | 150110-9  | Female | 305 | 248 | 172 | 207 | 360 | 256 | 374 | 327 | 330 | 225 | 1 | R002 | 3 | F8  | 8   | 30 9.58   | 26.08 |
| 5 | 150110-9  | Male   | 305 | 248 | 175 | 177 | 360 | 256 | 374 | 327 | 330 | 225 | 2 | R089 | 3 | F8  | 8   | 30 9.58   | 26.08 |
| 5 | 150118-1  | Female | 345 | 248 | 172 | 207 | 324 | 256 | 374 | 327 | 330 | 225 | 2 | R021 | 1 | B3  | 56  | 60 9.31   | 3.36  |
| 5 | 150118-1  | Male   | 345 | 248 | 175 | 207 | 330 | 256 | 374 | 327 | 330 | 228 | 1 | R192 | 1 | B3  | 56  | 60 9.31   | 3.36  |
| 5 | 150118-2  | Female | 345 | 248 | 172 | 207 | 324 | 256 | 374 | 327 | 330 | 225 | 2 | R021 | 1 | D5  | 28  | 63 11.23  | 5.09  |
| 5 | 150118-2  | Male   | 345 | 248 | 172 | 207 | 324 | 256 | 374 | 327 | 330 | 228 | 1 | R193 | 1 | D5  | 28  | 63 11.23  | 5.09  |
| 5 | 150121-1  | Female | 305 | 248 | 172 | 165 | 360 | 256 | 374 | 327 | 330 | 225 | 1 | R010 | 3 | F10 | 13  | 69 11.84  | 26.83 |
| 5 | 150121-1  | Male   | 345 | 248 | 172 | 207 | 330 | 256 | 374 | 327 | 330 | 225 | 2 | R063 | 3 | F10 | 13  | 69 11.84  | 26.83 |
| 5 | 150121-2  | Female | 345 | 269 | 172 | 165 | 330 | 256 | 374 | 339 | 330 | 228 | 2 | R004 | 3 | B2  | 5   | 90 5.80   | 20.28 |
| 5 | 150121-2  | Male   | 345 | 269 | 172 | 162 | 330 | 256 | 374 | 339 | 330 | 228 | 1 | R194 | 3 | B2  | 5   | 90 5.80   | 20.28 |
| 5 | 150121-3  | Female | 345 | 248 | 172 | 207 | 324 | 256 | 374 | 327 | 330 | 225 | 2 | R021 | 1 | A3  | 93  | 79 9.51   | 2.75  |
| 5 | 150121-3  | Male   | 325 | 248 | 172 | 207 | 330 | 256 | 374 | 327 | 330 | 225 | 1 | R195 | 1 | A3  | 93  | 79 9.51   | 2.75  |
| 5 | 150121-4  | Female | 345 | 269 | 172 | 165 | 330 | 256 | 374 | 339 | 330 | 228 | 2 | R004 | 3 | Z2  | 77  | 13 5.48   | 18.73 |
| 5 | 150121-4  | Male   | 305 | 248 | 175 | 207 | 360 | 256 | 374 | 327 | 330 | 225 | 1 | R196 | 3 | Z2  | 77  | 13 5.48   | 18.73 |
| 5 | 150121-6  | Female | 345 | 266 | 172 | 207 | 330 | 256 | 362 | 327 | 330 | 225 | 1 | R044 | 1 | G3  | 43  | 65 9.35   | 8.16  |
| 5 | 150121-6  | Male   | 305 | 248 | 172 | 165 | 342 | 256 | 374 | 339 | 330 | 228 | 2 | R197 | 1 | G3  | 43  | 65 9.35   | 8.16  |
| 5 | 150121-7  | Female | 345 | 248 | 172 | 207 | 324 | 256 | 374 | 327 | 330 | 225 | 2 | R021 | 1 | B5  | 45  | 70 11.31  | 3.28  |
| 5 | 150121-7  | Male   | 345 | 248 | 172 | 207 | 324 | 256 | 374 | 327 | 330 | 228 | 1 | R193 | 1 | B5  | 45  | 70 11.31  | 3.28  |
| 5 | 150121-9  | Female | 305 | 248 | 172 | 165 | 360 | 256 | 374 | 327 | 330 | 225 | 1 | R010 | 3 | D10 | 53  | 102 12.66 | 25.23 |
| 5 | 150121-9  | Male   | 305 | 248 | 175 | 207 | 360 | 256 | 374 | 327 | 330 | 225 | 2 | R191 | 3 | D10 | 53  | 102 12.66 | 25.23 |

|   |             |        |     |     |     |     |     |     |     |     |     |     |   |      |   |    |    |          |       |
|---|-------------|--------|-----|-----|-----|-----|-----|-----|-----|-----|-----|-----|---|------|---|----|----|----------|-------|
| 5 | 150208-1    | Female | 345 | 248 | 172 | 207 | 324 | 256 | 374 | 327 | 330 | 225 | 2 | R021 | 1 | A3 | 83 | 78 9.47  | 2.63  |
| 5 | 150208-1    | Male   | 345 | 248 | 172 | 221 | 330 | 256 | 374 | 327 | 330 | 225 | 1 | R198 | 1 | A3 | 83 | 78 9.47  | 2.63  |
| 5 | 150208-2    | Female | 305 | 248 | 172 | 207 | 360 | 256 | 374 | 327 | 330 | 225 | 1 | R002 | 3 | E6 | 72 | 85 8.35  | 25.26 |
| 5 | 150208-2    | Male   | 305 | 266 | 172 | 207 | 360 | 256 | 374 | 339 | 330 | 225 | 2 | R199 | 3 | E6 | 72 | 85 8.35  | 25.26 |
| 5 | 150208-3    | Female | 305 | 248 | 172 | 207 | 360 | 256 | 374 | 327 | 330 | 225 | 1 | R002 | 3 | G7 | 34 | 14 8.07  | 27.06 |
| 5 | 150208-3    | Male   | 345 | 248 | 172 | 207 | 330 | 256 | 374 | 327 | 330 | 225 | 2 | R063 | 3 | G7 | 34 | 14 8.07  | 27.06 |
| 5 | 150208-4    | Female | 345 | 248 | 172 | 207 | 324 | 256 | 374 | 327 | 330 | 225 | 2 | R021 | 1 | D4 | 11 | 14 9.81  | 4.93  |
| 5 | 150208-4    | Male   | 345 | 248 | 172 | 207 | 324 | 256 | 374 | 327 | 330 | 225 | 1 | R074 | 1 | D4 | 11 | 14 9.81  | 4.93  |
| 5 | 150208-5    | Female | 305 | 248 | 172 | 207 | 360 | 253 | 374 | 327 | 330 | 225 | 1 | R005 | 3 | G7 | 61 | 31 8.14  | 27.36 |
| 5 | 150208-5    | Male   | 305 | 248 | 172 | 177 | 360 | 256 | 374 | 327 | 330 | 225 | 2 | R090 | 3 | G7 | 61 | 31 8.14  | 27.36 |
| 5 | 150208-6    | Female | 345 | 248 | 172 | 207 | 324 | 256 | 374 | 327 | 330 | 225 | 2 | R021 | 1 | B5 | 52 | 51 11.12 | 3.32  |
| 5 | 150208-6    | Male   | 345 | 248 | 175 | 207 | 324 | 256 | 374 | 327 | 330 | 225 | 1 | R200 | 1 | B5 | 52 | 51 11.12 | 3.32  |
| 5 | 150208-7    | Female | 305 | 248 | 172 | 165 | 360 | 256 | 374 | 327 | 330 | 225 | 1 | R010 | 3 | D8 | 45 | 53 10.33 | 24.46 |
| 5 | 150208-7    | Male   | 305 | 248 | 172 | 165 | 330 | 253 | 374 | 327 | 330 | 225 | 2 | R201 | 3 | D8 | 45 | 53 10.33 | 24.46 |
| 5 | 150208-8    | Female | 345 | 248 | 172 | 207 | 324 | 256 | 374 | 327 | 330 | 225 | 2 | R021 | 1 | B4 | 24 | 25 9.93  | 3.05  |
| 5 | 150208-8    | Male   | 345 | 248 | 172 | 207 | 330 | 256 | 374 | 327 | 330 | 225 | 1 | R085 | 1 | B4 | 24 | 25 9.93  | 3.05  |
| 5 | 150220-1    | Female | 305 | 248 | 172 | 165 | 360 | 256 | 374 | 327 | 330 | 225 | 1 | R010 | 3 | F7 | 60 | 24 8.42  | 26.32 |
| 5 | 150220-1    | Male   | 305 | 248 | 172 | 165 | 360 | 256 | 374 | 327 | 330 | 225 | 2 | R202 | 3 | F7 | 60 | 24 8.42  | 26.32 |
| 5 | 150220-11   | Female | 345 | 248 | 172 | 207 | 324 | 256 | 374 | 327 | 330 | 225 | 2 | R021 | 1 | B5 | 47 | 70 11.31 | 3.28  |
| 5 | 150220-11   | Male   | 345 | 248 | 172 | 177 | 324 | 256 | 374 | 327 | 330 | 225 | 1 | R103 | 1 | B5 | 47 | 70 11.31 | 3.28  |
| 5 | 150220-12   | Female | 305 | 248 | 172 | 165 | 360 | 256 | 374 | 327 | 330 | 225 | 1 | R010 | 3 | F6 | 76 | 90 8.04  | 26.37 |
| 5 | 150220-12   | Male   | 345 | 248 | 172 | 207 | 360 | 256 | 374 | 327 | 330 | 225 | 2 | R124 | 3 | F6 | 76 | 90 8.04  | 26.37 |
| 5 | 150220-13   | Female | 296 | 248 | 172 | 207 | 330 | 256 | 374 | 327 | 330 | 225 | 2 | R071 | 1 | C5 | 52 | 36 11.00 | 4.32  |
| 5 | 150220-13   | Male   | 345 | 269 | 172 | 177 | 324 | 256 | 374 | 327 | 330 | 225 | 1 | R164 | 1 | C5 | 52 | 36 11.00 | 4.32  |
| 5 | 150220-14   | Female | 305 | 269 | 172 | 207 | 324 | 256 | 374 | 339 | 330 | 225 | 1 | R072 | 1 | B4 | 65 | 90 10.54 | 3.48  |
| 5 | 150220-14   | Male   | 345 | 248 | 172 | 207 | 324 | 256 | 374 | 327 | 330 | 225 | 2 | R021 | 1 | B4 | 65 | 90 10.54 | 3.48  |
| 5 | 150220-15   | Female | 305 | 248 | 172 | 207 | 360 | 253 | 374 | 327 | 330 | 225 | 1 | R005 | 3 | D8 | 64 | 85 10.56 | 24.74 |
| 5 | 150220-15   | Male   | 345 | 248 | 172 | 207 | 360 | 256 | 374 | 327 | 330 | 225 | 2 | R124 | 3 | D8 | 64 | 85 10.56 | 24.74 |
| 5 | 150220-2    | Female | 345 | 248 | 172 | 165 | 342 | 256 | 374 | 327 | 330 | 225 | 2 | R069 | 3 | F3 | 83 | 20 4.54  | 25.35 |
| 5 | 150220-2    | Male   | 345 | 248 | 172 | 162 | 342 | 256 | 374 | 327 | 330 | 225 | 1 | R203 | 3 | F3 | 83 | 20 4.54  | 25.35 |
| 5 | 150220-3    | Female | 345 | 248 | 172 | 207 | 324 | 256 | 374 | 327 | 330 | 225 | 2 | R021 | 1 | D6 | 6  | 37 11.92 | 4.86  |
| 5 | 150220-3    | Male   | 345 | 248 | 172 | 207 | 324 | 256 | 374 | 327 | 330 | 225 | 1 | R074 | 1 | D6 | 6  | 37 11.92 | 4.86  |
| 5 | 150220-4    | Female | 345 | 248 | 172 | 207 | 324 | 256 | 374 | 327 | 330 | 225 | 2 | R021 | 1 | D6 | 4  | 35 11.92 | 4.86  |
| 5 | 150220-4    | Male   | 345 | 269 | 172 | 177 | 330 | 256 | 374 | 320 | 330 | 225 | 1 | R204 | 1 | D6 | 4  | 35 11.92 | 4.86  |
| 5 | 150220-5    | Female | 305 | 248 | 172 | 165 | 360 | 256 | 374 | 327 | 330 | 225 | 1 | R010 | 3 | G6 | 50 | 86 7.77  | 27.13 |
| 5 | 150220-5    | Male   | 345 | 248 | 172 | 207 | 330 | 256 | 374 | 327 | 330 | 225 | 2 | R063 | 3 | G6 | 50 | 86 7.77  | 27.13 |
| 5 | 150220-6    | Female | 345 | 248 | 172 | 207 | 324 | 253 | 374 | 327 | 338 | 225 | 2 | R001 | 3 | E4 | 59 | 86 6.52  | 24.56 |
| 5 | 150220-6    | Male   | 305 | 248 | 175 | 207 | 360 | 256 | 374 | 327 | 330 | 225 | 1 | R196 | 3 | E4 | 59 | 86 6.52  | 24.56 |
| 5 | 150220-7    | Female | 345 | 248 | 172 | 207 | 324 | 256 | 374 | 327 | 330 | 225 | 2 | R021 | 1 | A3 | 3  | 67 9.39  | 1.86  |
| 5 | 150220-7    | Male   | 305 | 248 | 172 | 207 | 330 | 256 | 374 | 327 | 330 | 225 | 1 | R043 | 1 | A3 | 3  | 67 9.39  | 1.86  |
| 5 | 150220-8    | Female | 345 | 248 | 172 | 165 | 330 | 256 | 374 | 327 | 306 | 225 | 2 | R070 | 3 | D6 | 70 | 82 8.65  | 24.18 |
| 5 | 150220-8    | Male   | 345 | 248 | 172 | 165 | 360 | 256 | 374 | 327 | 330 | 225 | 1 | R205 | 3 | D6 | 70 | 82 8.65  | 24.18 |
| 5 | 150220-9    | Female | 305 | 248 | 172 | 165 | 360 | 256 | 374 | 327 | 330 | 225 | 1 | R010 | 3 | G7 | 24 | 60 8.54  | 27.09 |
| 5 | 150220-9    | Male   | 305 | 248 | 172 | 165 | 360 | 256 | 374 | 327 | 330 | 225 | 2 | R202 | 3 | G7 | 24 | 60 8.54  | 27.09 |
| 5 | 2014-A11-A3 | ECM    | 345 | 248 | 172 | 207 | 324 | 256 | 374 | 327 | 330 | 225 | 2 | R021 | 1 | A3 | 50 | 50 9.20  | 2.32  |
| 5 | 2014-A11-B6 | ECM    | 345 | 266 | 172 | 207 | 324 | 262 | 386 | 316 | 306 | 225 | 2 | R073 | 1 | B6 | 50 | 50 12.08 | 3.32  |
| 5 | 2014-A11-C3 | ECM    | 305 | 248 | 172 | 207 | 330 | 256 | 350 | 339 | 330 | 225 | 2 | R058 | 1 | C3 | 50 | 50 9.20  | 4.32  |
| 5 | 2014-A11-D6 | ECM    | 345 | 248 | 172 | 207 | 324 | 256 | 374 | 327 | 330 | 225 | 2 | R021 | 1 | D6 | 50 | 50 12.08 | 5.32  |
| 5 | 2014-A11-E3 | ECM    | 345 | 266 | 172 | 207 | 330 | 256 | 362 | 327 | 330 | 225 | 1 | R044 | 1 | E3 | 50 | 50 9.20  | 6.28  |
| 5 | 2014-A11-E4 | ECM    | 345 | 248 | 172 | 207 | 324 | 256 | 374 | 327 | 334 | 225 | 1 | R055 | 1 | E4 | 50 | 50 10.16 | 6.28  |
| 5 | 2014-A12-D8 | ECM    | 345 | 266 | 172 | 207 | 330 | 256 | 362 | 327 | 330 | 228 | 2 | R075 | 1 | D8 | 50 | 50 14.00 | 5.32  |
| 5 | 2014-B11-C3 | ECM    | 305 | 269 | 172 | 165 | 342 | 256 | 374 | 327 | 314 | 225 | 1 | R100 | 1 | C3 | 50 | 50 9.20  | 4.32  |
| 5 | 2014-B11-F5 | ECM    | 345 | 266 | 172 | 207 | 330 | 256 | 362 | 327 | 330 | 225 | 1 | R044 | 1 | F5 | 50 | 50 11.12 | 7.24  |
| 5 | 2014-D11-C5 | ECM    | 309 | 248 | 172 | 207 | 342 | 253 | 374 | 327 | 330 | 225 | 2 | R049 | 2 | C5 | 50 | 50 10.93 | 14.96 |
| 5 | 2014-D11-D5 | ECM    | 305 | 251 | 172 | 156 | 330 | 256 | 374 | 339 | 330 | 225 | 2 | R061 | 2 | D5 | 50 | 50 10.93 | 15.92 |
| 5 | 2014-D11-F5 | ECM    | 305 | 248 | 172 | 210 | 324 | 256 | 374 | 339 | 322 | 225 | 1 | R076 | 2 | F5 | 50 | 50 10.93 | 17.88 |
| 5 | 2014-E10-A2 | ECM    | 345 | 269 | 172 | 165 | 330 | 256 | 374 | 339 | 330 | 228 | 2 | R004 | 3 | A2 | 50 | 50 5.61  | 19.61 |
| 5 | 2014-F10-B4 | ECM    | 345 | 248 | 172 | 207 | 324 | 256 | 374 | 327 | 330 | 225 | 2 | R021 | 3 | B4 | 50 | 50 7.19  | 21.23 |
| 5 | 2014-F10-C3 | ECM    | 345 | 248 | 172 | 207 | 330 | 256 | 374 | 327 | 330 | 225 | 2 | R063 | 3 | C3 | 50 | 50 5.91  | 22.00 |
| 5 | 2014-F10-D4 | ECM    | 345 | 248 | 172 | 207 | 324 | 256 | 386 | 339 | 330 | 225 | 2 | R017 | 3 | D4 | 50 | 50 6.54  | 23.32 |
| 5 | 2014-F10-E3 | ECM    | 345 | 248 | 172 | 165 | 342 | 256 | 374 | 327 | 330 | 225 | 2 | R069 | 3 | E3 | 50 | 50 5.27  | 24.05 |

|   |              |     |     |     |     |     |     |     |     |     |     |     |   |      |   |     |    |          |       |
|---|--------------|-----|-----|-----|-----|-----|-----|-----|-----|-----|-----|-----|---|------|---|-----|----|----------|-------|
| 5 | 2014-F11-B10 | ECM | 300 | 248 | 169 | 207 | 324 | 253 | 374 | 339 | 326 | 225 | 1 | R077 | 3 | B10 | 50 | 50 12.84 | 23.00 |
| 5 | 2014-F11-B6  | ECM | 345 | 248 | 172 | 165 | 342 | 253 | 374 | 339 | 330 | 225 | 2 | R003 | 3 | B6  | 50 | 50 9.06  | 21.82 |
| 5 | 2014-F11-B8  | ECM | 345 | 248 | 172 | 165 | 342 | 256 | 374 | 339 | 330 | 225 | 2 | R206 | 3 | B8  | 50 | 50 10.93 | 22.40 |
| 5 | 2014-F11-C11 | ECM | 305 | 248 | 172 | 207 | 360 | 256 | 374 | 327 | 330 | 225 | 1 | R002 | 3 | C11 | 50 | 50 13.46 | 24.36 |
| 5 | 2014-F11-C5  | ECM | 345 | 248 | 172 | 207 | 330 | 256 | 374 | 339 | 330 | 225 | 2 | R007 | 3 | C5  | 50 | 50 7.81  | 22.59 |
| 5 | 2014-F11-C7  | ECM | 345 | 248 | 172 | 165 | 342 | 256 | 374 | 339 | 330 | 225 | 2 | R206 | 3 | C7  | 50 | 50 9.65  | 23.17 |
| 5 | 2014-F11-C9  | ECM | 305 | 248 | 172 | 207 | 360 | 256 | 374 | 327 | 330 | 225 | 1 | R002 | 3 | C9  | 50 | 50 11.55 | 23.76 |
| 5 | 2014-F11-D10 | ECM | 305 | 248 | 172 | 207 | 360 | 256 | 374 | 327 | 330 | 225 | 1 | R002 | 3 | D10 | 50 | 50 12.19 | 25.09 |
| 5 | 2014-F11-D6  | ECM | 345 | 248 | 172 | 207 | 330 | 256 | 374 | 339 | 306 | 225 | 2 | R051 | 3 | D6  | 50 | 50 8.41  | 23.91 |
| 5 | 2014-F11-D8  | ECM | 305 | 248 | 172 | 207 | 360 | 256 | 374 | 327 | 330 | 225 | 1 | R002 | 3 | D8  | 50 | 50 10.28 | 24.49 |
| 5 | 2014-F11-E11 | ECM | 305 | 248 | 172 | 207 | 360 | 256 | 374 | 327 | 330 | 225 | 1 | R002 | 3 | E11 | 50 | 50 12.82 | 26.41 |
| 5 | 2014-F11-E7  | ECM | 305 | 248 | 172 | 207 | 360 | 256 | 374 | 327 | 330 | 225 | 1 | R002 | 3 | E7  | 50 | 50 9.01  | 25.22 |
| 5 | 2014-F11-E9  | ECM | 305 | 248 | 172 | 156 | 330 | 256 | 374 | 327 | 330 | 225 | 1 | R067 | 3 | E9  | 50 | 50 10.91 | 25.81 |
| 5 | 2014-F11-F10 | ECM | 305 | 248 | 172 | 207 | 360 | 256 | 374 | 327 | 330 | 225 | 1 | R002 | 3 | F10 | 50 | 50 11.53 | 27.17 |
| 5 | 2014-F11-F6  | ECM | 305 | 248 | 172 | 207 | 360 | 256 | 374 | 327 | 330 | 225 | 1 | R002 | 3 | F6  | 50 | 50 7.76  | 26.00 |
| 5 | 2014-F11-F8  | ECM | 305 | 248 | 172 | 207 | 342 | 256 | 374 | 327 | 330 | 225 | 1 | R015 | 3 | F8  | 50 | 50 9.63  | 26.58 |
| 5 | 2014-F11-G5  | ECM | 345 | 248 | 172 | 207 | 324 | 253 | 374 | 327 | 338 | 225 | 2 | R001 | 3 | G5  | 50 | 50 6.52  | 26.74 |
| 5 | 2014-F11-G7  | ECM | 305 | 248 | 172 | 207 | 360 | 256 | 374 | 327 | 330 | 225 | 1 | R002 | 3 | G7  | 50 | 50 8.35  | 27.31 |
| 5 | 2014-F11-G9  | ECM | 305 | 248 | 172 | 207 | 360 | 256 | 374 | 327 | 330 | 225 | 1 | R002 | 3 | G9  | 50 | 50 10.26 | 27.90 |

Table S2: Genotypes description, probability of genotypes occurrence resulting from distinct sexual events (P<sub>Sex</sub>) for all samples harvested in the orchard.

| Genotype | n  | P <sub>Sex</sub> | Significance | Level |
|----------|----|------------------|--------------|-------|
| R001     | 14 | 0                | 0            | ***   |
| R002     | 60 | 0                | 0            | ***   |
| R003     | 21 | 2,15E-09         | 0            | ***   |
| R004     | 15 | 0                | 0            | ***   |
| R005     | 38 | 0                | 0            | ***   |
| R006     | 1  | -                | -            | -     |
| R007     | 13 | 1,99E-01         | 0.00022986   | ***   |
| R008     | 3  | 0.00278014       | 0.0359655    | *     |
| R009     | 3  | 6,48E-01         | 0.000521017  | ***   |
| R010     | 12 | 4,21E-01         | 0.000398425  | ***   |
| R011     | 1  | -                | -            | -     |
| R012     | 1  | -                | -            | -     |
| R013     | 1  | -                | -            | -     |
| R014     | 2  | 0.184287         | 0.454204     | ns    |
| R015     | 2  | 0.811735         | 0.947132     | ns    |
| R016     | 1  | -                | -            | -     |
| R017     | 3  | 7,70E-01         | 0.000551665  | ***   |
| R018     | 2  | 1,80E-03         | 0            | ***   |
| R019     | 1  | -                | -            | -     |
| R020     | 1  | -                | -            | -     |
| R021     | 48 | 0                | 0            | ***   |
| R022     | 3  | 6,25E-05         | 0            | ***   |
| R023     | 1  | -                | -            | -     |
| R024     | 1  | -                | -            | -     |
| R025     | 4  | 0                | 0            | ***   |
| R026     | 1  | -                | -            | -     |
| R027     | 1  | -                | -            | -     |
| R028     | 1  | -                | -            | -     |
| R029     | 1  | -                | -            | -     |
| R030     | 3  | 0.000927255      | 0.0183429    | *     |
| R031     | 1  | -                | -            | -     |
| R032     | 1  | -                | -            | -     |
| R033     | 1  | -                | -            | -     |
| R034     | 1  | -                | -            | -     |
| R035     | 1  | -                | -            | -     |
| R036     | 1  | -                | -            | -     |
| R037     | 1  | -                | -            | -     |
| R038     | 1  | -                | -            | -     |
| R039     | 1  | -                | -            | -     |
| R040     | 1  | -                | -            | -     |
| R041     | 1  | -                | -            | -     |



|      |    |             |             |     |
|------|----|-------------|-------------|-----|
| R042 | 1  | -           | -           | -   |
| R043 | 2  | 0.98874     | 0.997242    | ns  |
| R044 | 15 | 0           | 0           | *** |
| R045 | 1  | -           | -           | -   |
| R046 | 1  | -           | -           | -   |
| R047 | 3  | 0.000109801 | 0.00401489  | **  |
| R048 | 1  | -           | -           | -   |
| R049 | 8  | 0           | 0           | *** |
| R050 | 1  | -           | -           | -   |
| R051 | 5  | 4,91E-03    | 1,53E-01    | *** |
| R052 | 1  | -           | -           | -   |
| R053 | 1  | -           | -           | -   |
| R054 | 1  | -           | -           | -   |
| R055 | 2  | 0.01238     | 0.0923119   | ns  |
| R056 | 1  | -           | -           | -   |
| R057 | 1  | -           | -           | -   |
| R058 | 3  | 1,32E+00    | 0.000919442 | *** |
| R059 | 1  | -           | -           | -   |
| R060 | 1  | -           | -           | -   |
| R061 | 7  | 0           | 0           | *** |
| R062 | 1  | -           | -           | -   |
| R063 | 7  | 0.57498     | 0.791455    | ns  |
| R064 | 1  | -           | -           | -   |
| R065 | 1  | -           | -           | -   |
| R066 | 2  | 0.853594    | 0.958104    | ns  |
| R067 | 3  | 0.0125686   | 0.0935685   | ns  |
| R068 | 2  | 0.98731     | 0.996828    | ns  |
| R069 | 5  | 0.00375721  | 0.043888    | *   |
| R070 | 1  | -           | -           | -   |
| R071 | 1  | -           | -           | -   |
| R072 | 1  | -           | -           | -   |
| R073 | 1  | -           | -           | -   |
| R074 | 3  | 0.965069    | 0.990714    | ns  |
| R075 | 1  | -           | -           | -   |
| R076 | 1  | -           | -           | -   |
| R077 | 1  | -           | -           | -   |
| R078 | 2  | 0.411163    | 0.672725    | ns  |
| R079 | 1  | -           | -           | -   |
| R080 | 2  | 0.000835502 | 0.0169943   | *   |
| R081 | 1  | -           | -           | -   |
| R082 | 10 | 0.214374    | 0.486369    | ns  |
| R083 | 1  | -           | -           | -   |
| R084 | 2  | 0.28696     | 0.554086    | ns  |
| R085 | 3  | 0.977273    | 0.993855    | ns  |
| R086 | 1  | -           | -           | -   |
| R087 | 1  | -           | -           | -   |

|      |    |             |            |     |
|------|----|-------------|------------|-----|
| R088 | 1  | -           | -          | -   |
| R089 | 2  | 0.000849281 | 0.0171016  | *   |
| R090 | 8  | 4,62E+00    | 0.00214536 | **  |
| R091 | 1  | -           | -          | -   |
| R092 | 1  | -           | -          | -   |
| R093 | 1  | -           | -          | -   |
| R094 | 1  | -           | -          | -   |
| R095 | 1  | -           | -          | -   |
| R096 | 1  | -           | -          | -   |
| R097 | 1  | -           | -          | -   |
| R098 | 1  | -           | -          | -   |
| R099 | 1  | -           | -          | -   |
| R100 | 7  | 2,24E-09    | 0          | *** |
| R101 | 1  | -           | -          | -   |
| R102 | 2  | 0.0123506   | 0.0918675  | ns  |
| R103 | 18 | 3,55E-10    | 0          | *** |
| R104 | 2  | 0.000303596 | 0.00812173 | **  |
| R105 | 1  | -           | -          | -   |
| R106 | 2  | 0.0107915   | 0.0846959  | ns  |
| R107 | 1  | -           | -          | -   |
| R108 | 1  | -           | -          | -   |
| R109 | 1  | -           | -          | -   |
| R110 | 1  | -           | -          | -   |
| R111 | 1  | -           | -          | -   |
| R112 | 1  | -           | -          | -   |
| R113 | 1  | -           | -          | -   |
| R114 | 1  | -           | -          | -   |
| R115 | 1  | -           | -          | -   |
| R116 | 1  | -           | -          | -   |
| R117 | 1  | -           | -          | -   |
| R118 | 2  | 1,42E-02    | 0.00095009 | *** |
| R119 | 1  | -           | -          | -   |
| R120 | 1  | -           | -          | -   |
| R121 | 1  | -           | -          | -   |
| R122 | 1  | -           | -          | -   |
| R123 | 1  | -           | -          | -   |
| R124 | 6  | 0.844697    | 0.954518   | ns  |
| R125 | 1  | -           | -          | -   |
| R126 | 1  | -           | -          | -   |
| R127 | 1  | -           | -          | -   |
| R128 | 1  | -           | -          | -   |
| R129 | 1  | -           | -          | -   |
| R130 | 1  | -           | -          | -   |
| R131 | 1  | -           | -          | -   |
| R132 | 1  | -           | -          | -   |
| R133 | 1  | -           | -          | -   |

|      |   |            |             |     |
|------|---|------------|-------------|-----|
| R134 | 1 | -          | -           | -   |
| R135 | 1 | -          | -           | -   |
| R136 | 2 | 0.00388914 | 0.0447462   | *   |
| R137 | 1 | -          | -           | -   |
| R138 | 1 | -          | -           | -   |
| R139 | 1 | -          | -           | -   |
| R140 | 1 | -          | -           | -   |
| R141 | 1 | -          | -           | -   |
| R142 | 1 | -          | -           | -   |
| R143 | 1 | -          | -           | -   |
| R144 | 2 | 0.00242458 | 0.032441    | *   |
| R145 | 2 | 1,34E-01   | 0.000183888 | *** |
| R146 | 1 | -          | -           | -   |
| R147 | 1 | -          | -           | -   |
| R148 | 1 | -          | -           | -   |
| R149 | 1 | -          | -           | -   |
| R150 | 2 | 9,98E+00   | 0.00373906  | **  |
| R151 | 1 | -          | -           | -   |
| R152 | 1 | -          | -           | -   |
| R153 | 1 | -          | -           | -   |
| R154 | 1 | -          | -           | -   |
| R155 | 1 | -          | -           | -   |
| R156 | 1 | -          | -           | -   |
| R157 | 1 | -          | -           | -   |
| R158 | 1 | -          | -           | -   |
| R159 | 1 | -          | -           | -   |
| R160 | 1 | -          | -           | -   |
| R161 | 1 | -          | -           | -   |
| R162 | 1 | -          | -           | -   |
| R163 | 1 | -          | -           | -   |
| R164 | 2 | 0.00606339 | 0.0602694   | ns  |
| R165 | 2 | 0.0676301  | 0.243269    | ns  |
| R166 | 1 | -          | -           | -   |
| R167 | 1 | -          | -           | -   |
| R168 | 1 | -          | -           | -   |
| R169 | 1 | -          | -           | -   |
| R170 | 2 | 6,40E+00   | 0.00263573  | **  |
| R171 | 1 | -          | -           | -   |
| R172 | 1 | -          | -           | -   |
| R173 | 1 | -          | -           | -   |
| R174 | 1 | -          | -           | -   |
| R175 | 2 | 0.00506935 | 0.0531284   | ns  |
| R176 | 1 | -          | -           | -   |
| R177 | 1 | -          | -           | -   |
| R178 | 1 | -          | -           | -   |
| R179 | 1 | -          | -           | -   |

|      |   |            |            |    |
|------|---|------------|------------|----|
| R180 | 1 | -          | -          | -  |
| R181 | 1 | -          | -          | -  |
| R182 | 1 | -          | -          | -  |
| R183 | 1 | -          | -          | -  |
| R184 | 2 | 3,91E+00   | 0.00190018 | ** |
| R185 | 1 | -          | -          | -  |
| R186 | 1 | -          | -          | -  |
| R187 | 1 | -          | -          | -  |
| R188 | 1 | -          | -          | -  |
| R189 | 1 | -          | -          | -  |
| R190 | 1 | -          | -          | -  |
| R191 | 2 | 0.0263676  | 0.148735   | ns |
| R192 | 1 | -          | -          | -  |
| R193 | 2 | 0.0541959  | 0.219486   | ns |
| R194 | 1 | -          | -          | -  |
| R195 | 1 | -          | -          | -  |
| R196 | 2 | 0.0274218  | 0.154052   | ns |
| R197 | 1 | -          | -          | -  |
| R198 | 1 | -          | -          | -  |
| R199 | 1 | -          | -          | -  |
| R200 | 1 | -          | -          | -  |
| R201 | 1 | -          | -          | -  |
| R202 | 2 | 0.647694   | 0.85479    | ns |
| R203 | 1 | -          | -          | -  |
| R204 | 1 | -          | -          | -  |
| R205 | 1 | -          | -          | -  |
| R206 | 3 | 0.00546325 | 0.0560553  | ns |
| R207 | 1 | -          | -          | -  |
| R208 | 1 | -          | -          | -  |
| R209 | 1 | -          | -          | -  |
| R210 | 2 | 0.346953   | 0.618953   | ns |
